# Supplementary material for: Rhodium(iii)-catalyzed tandem annulation reaction to build polycyclic benzothiazine derivatives
Source: Royal Society of Chemistry journal article supplement (doi:10.1039/c9qo00579j), 2019-01-01

## Supporting Information

### Rhodium(III)-Catalyzed Tandem Annulation Reaction to Build Polycyclic Benzothiazine Derivatives

Yang Li, Xin-Yang Liu, Yan-Jun Xu\* and Lin Dong\*

1. General experimental methods.
2. General procedure for the synthesis of compounds 3aa, 4 and 5.
3. Control experiments.
4. Mechanism study.
5. Characterization data.
6.  $^1\text{H}$  and  $^{13}\text{C}$  NMR spectra.

## 1. General methods.

NMR data were obtained for  $^1\text{H}$  at 400 MHz or 600 MHz, and for  $^{13}\text{C}$  at 100 MHz or 151 MHz. Chemical shifts were reported in ppm from tetramethylsilane with the solvent resonance as the internal standard in  $\text{CDCl}_3$  solution. ESI HRMS was recorded on a Waters SYNAPT G2 and Water XEVO G2 Q-ToF. UV detection was monitored at 220 nm. TLC was performed on glass-backed silica plates. Column chromatography was performed on silica gel (200-300 mesh), eluting with ethyl acetate and petroleum ether. These NH-sulfoximine substrates were prepared according to the literatures.<sup>[1,2,3]</sup> And these popargyl alcohols were prepared according to the literatures.<sup>[4,5]</sup>

## 2. General procedure for the synthesis of compounds **3aa**, **4** and **5**.

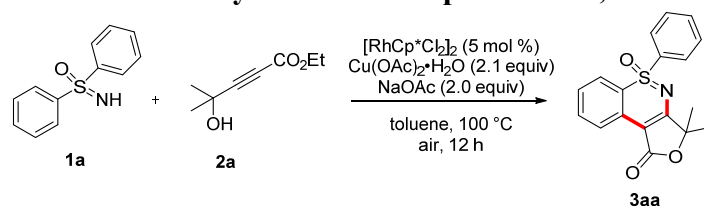

NH-Sulfoximine **1a** (0.1 mmol, 1.0 equiv), ethyl 4-hydroxy-4-methylpent-2-ynoate **2a** (0.2 mmol, 2.0 equiv),  $[\text{Cp}^*\text{RhCl}_2]_2$  (0.005 mmol, 5.0 mol %),  $\text{Cu}(\text{OAc})_2 \cdot \text{H}_2\text{O}$  (0.21 mmol, 2.1 equiv), and  $\text{NaOAc}$  (0.2 mmol, 2.0 equiv) were dissolved in 1.0 mL of toluene at 100 °C in sealing tube under air atmosphere. After stirring for 12 h, the reaction mixture was purified by flash chromatography eluting to give the product **3aa** as faint yellow oil (26.7 mg, 82%).

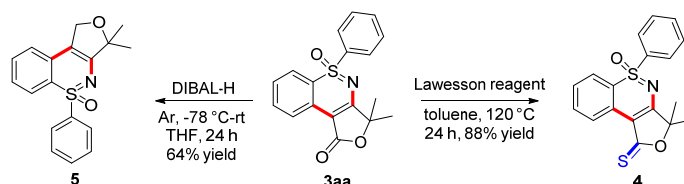

3,3-dimethyl-5-phenyl-5 $\lambda^4$ -benzo[*e*]furo[3,4-*c*][1,2]thiazine-1(3H)-thione 5-oxide **4**: A mixture of **3aa** (32.5 mg, 0.1 mmol, 1.0 equiv), Lawesson reagent (202 mg, 0.5 mmol, 5.0 equiv) dissolved in 1 mL toluene in sealing tube was stirred vigorously at 120 °C for 24 h. After completion, the mixture was extracted with ethyl acetate and washed with brine. The combine organic layers were dried with anhydrous sodium sulfate, concentrated under vacuum and the compound **4** was obtained as oil (30 mg, yield 88%) after purification by flash column chromatography on silica gel.

3,3-dimethyl-5-phenyl-1,3-dihydrobenzo[*e*]furo[3,4-*c*][1,2]thiazine 5-oxide **5**: To a solution of **3aa** (32.5 mg, 0.1 mmol, 1.0 equiv) in 1 mL steamed THF at Ar atmosphere was added DIBAL-H (0.3 mL, 0.45 mmol, 4.5 equiv) slowly at -78 °C then cooled to room temperature and stirred for 24 h. After completion, the mixture was quenched with ethyl acetate and washed with brine. The combine organic layers were dried with anhydrous sodium sulfate, concentrated under vacuum and the compound **5** was obtained as oil (20 mg, yield 64%) after purification by flash column chromatography on silica gel.

### 3. Control experiments.

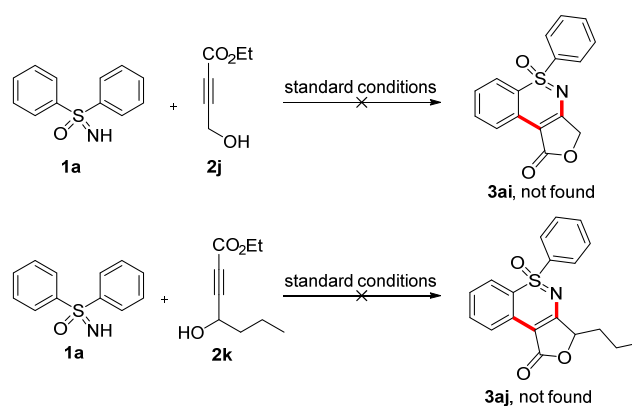

Both ethyl 4-hydroxybut-2-ynoate **2j** and ethyl 4-hydroxyhept-2-ynoate **2k** were tried as coupling partners to react with **1a** under standard conditions. But disappointingly, it turned out that the desired products **3ai** and **3aj** were not obtained while most of the starting material **1a** remained intact. In addition, other propargyl alcohols (**2h** and **2i**) shown bad activity to give desired products.

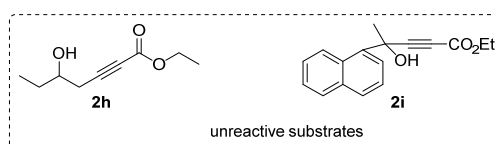

### 4. Characterization data.

Deuterium-labelling experiments were carried out to study the mechanism of this coupling reaction.

NH-Sulfoximine **1a** (0.05 mmol, 1.0 equiv),  $[\text{Cp}^*\text{RhCl}_2]_2$  (5.0 mol %),  $\text{Cu}(\text{OAc})_2 \cdot \text{H}_2\text{O}$  (2.1 equiv) and NaOAc (2.0 equiv) were dissolved in mixed solvents of 0.5 mL toluene and 0.1 mL  $\text{CD}_3\text{OD}$  at 100 °C in sealing tube under air atmosphere for 1h. After completion, the reaction mixture was filtered. The filtrate was concentrated in vacuo, and the reaction mixture was purified by flash chromatography eluting to give the product **[D<sub>4</sub>]-1a** as a white solid (9.9 mg, 91%). The deuterium rate (8%) was obtained from  $^1\text{H}$  NMR. Deuterium was observed at four *ortho*-positions, which indicated the possibility of the reaction pathway via *ortho* C–H activation.

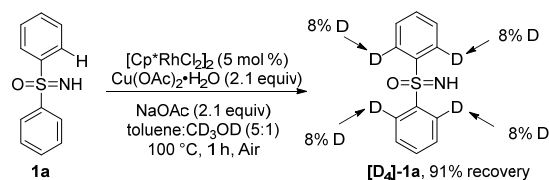

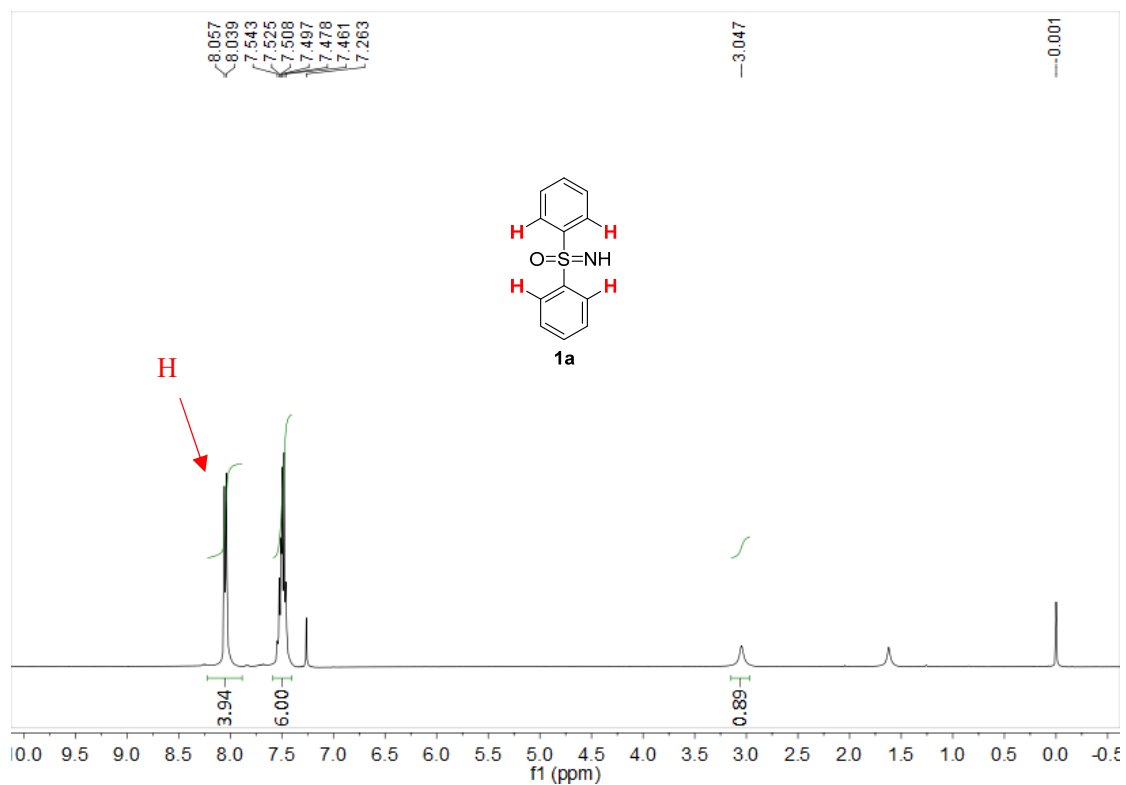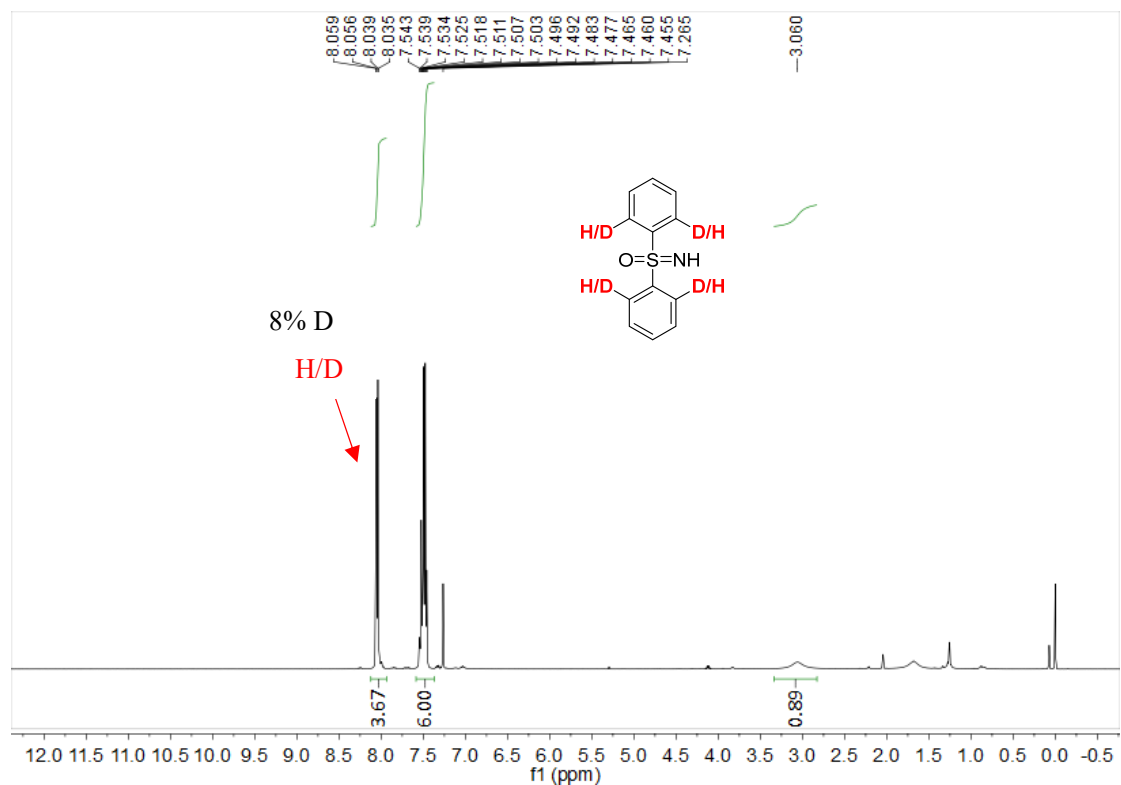

In addition, the kinetic isotope effect (KIE) study was conducted. NH-Sulfoximine **1a** (9.2 mg, 0.042 mmol), [**D**<sub>4</sub>]-**1a** (9.2 mg, 0.042 mmol, 85% D), ethyl 4-hydroxy-4-methylpent-2-ynoate **2a** (26.0 mg, 0.168 mmol), [Cp\**Rh*Cl<sub>2</sub>]<sub>2</sub> (2.6 mg, 5 mol %), Cu(OAc)<sub>2</sub>·H<sub>2</sub>O (35.2 mg, 2.1 equiv) and NaOAc (13.8 mg, 2 equiv) were stirred in toluene (0.9 mL) under air atmosphere at 100 °C for 12 h. After completion, the reaction mixture was purified by flash chromatography eluting with ethyl acetate and petroleum ether to give **3aa** + **3aa-[D]** (81%) as a yellow oil. The ratio of two products

was determined by  $^1\text{H}$  NMR integration method to give kinetic isotopic effect (KIE)  $k_{\text{H}}/k_{\text{D}} = 2.1$ , thus indicating that the first C–H bond cleavage might be involved in the rate-determining step.

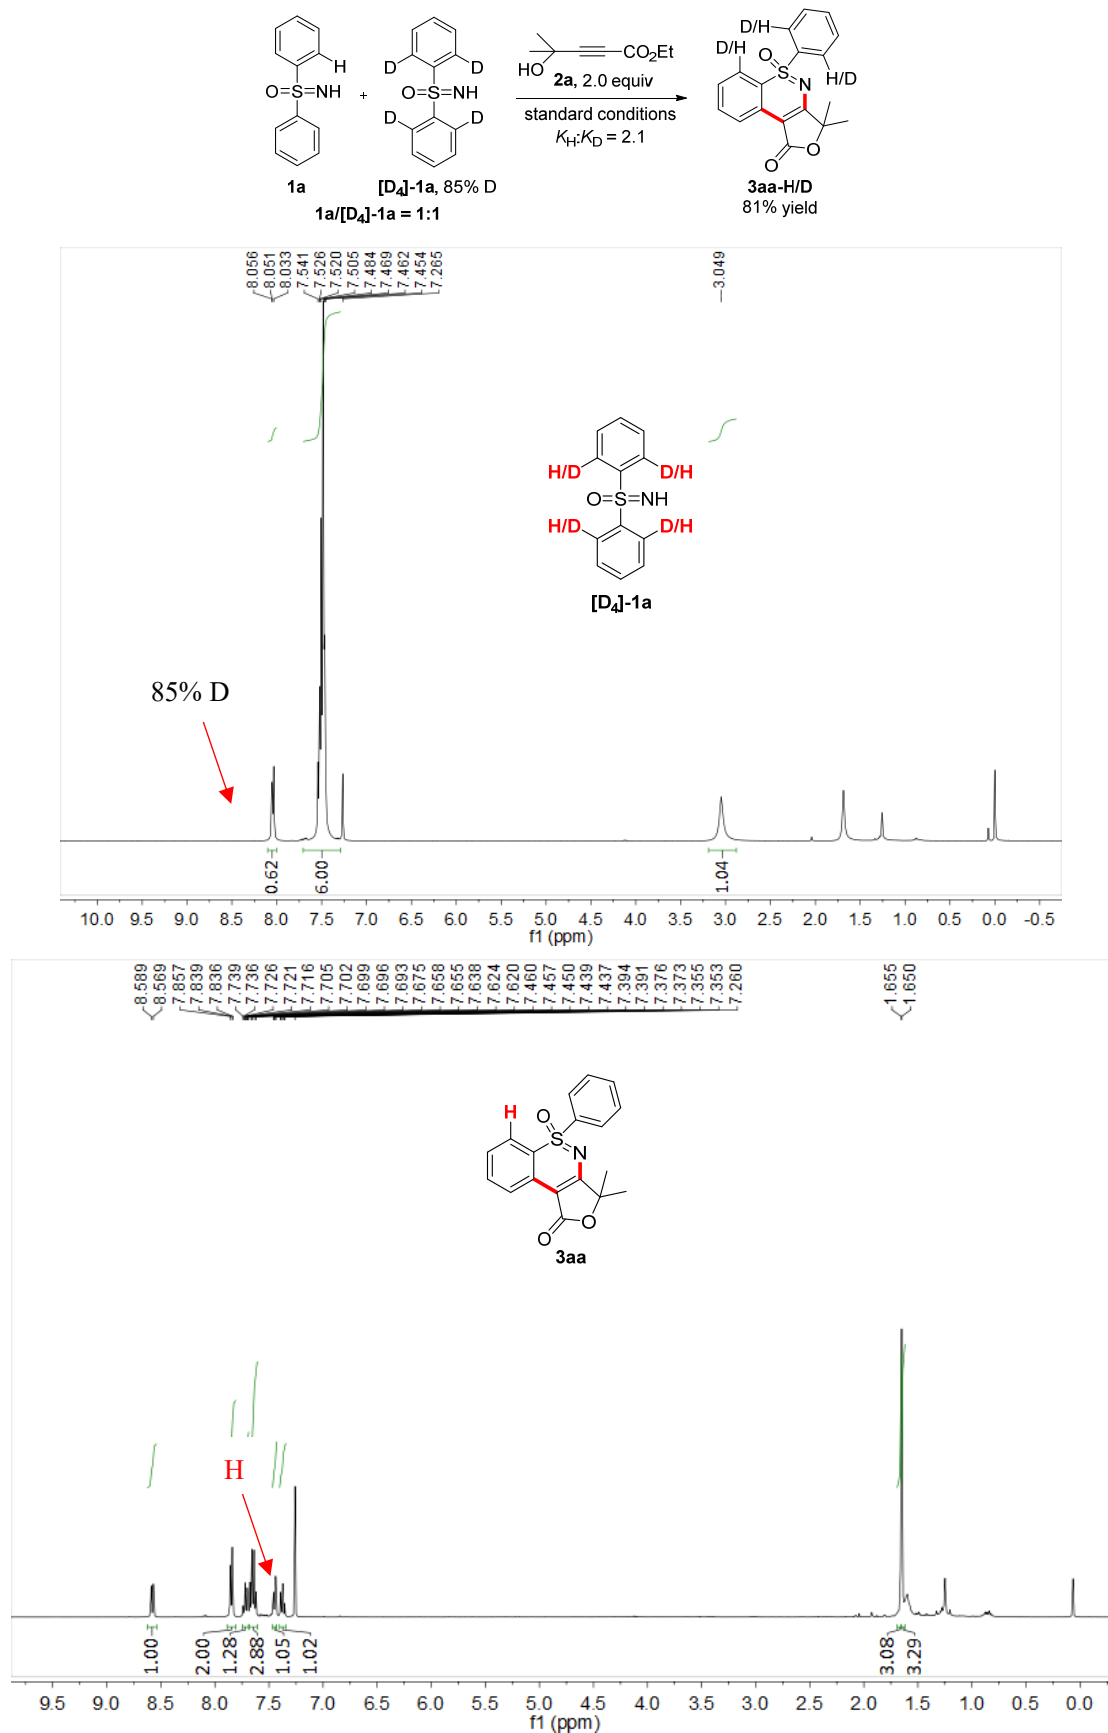

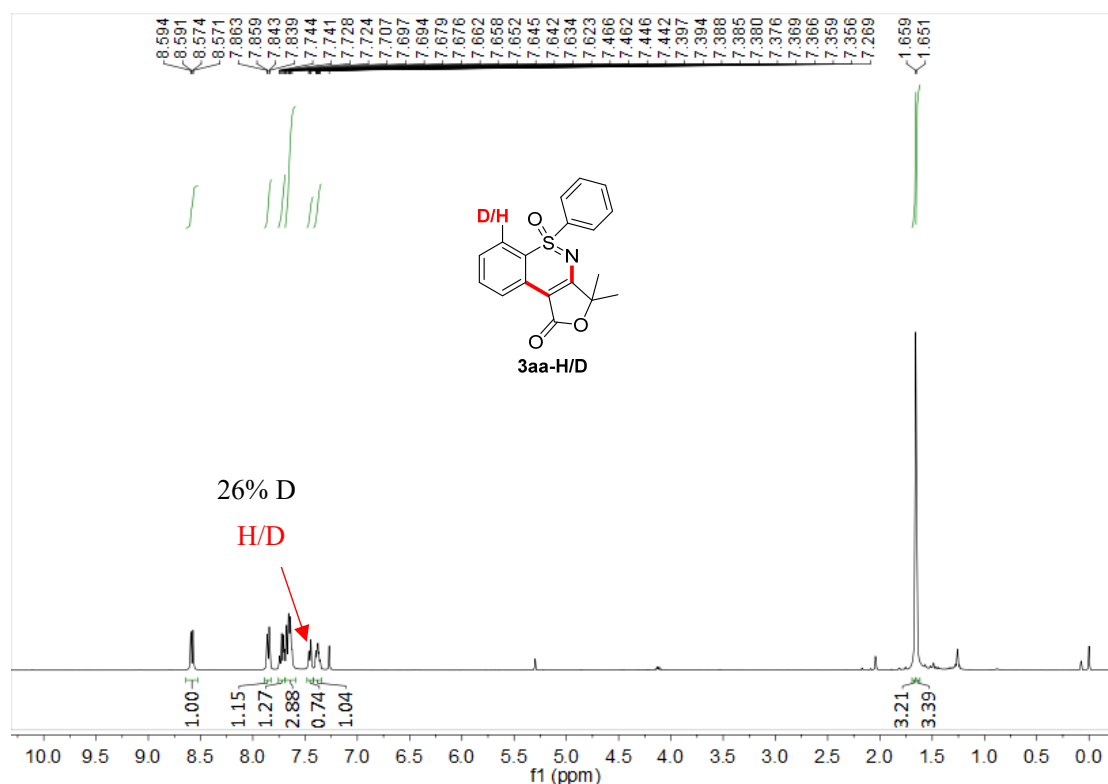

## 5. Characterization data.

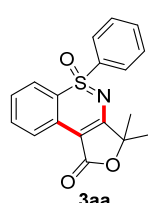

3,3-dimethyl-5-phenyl-5 $\lambda^4$ -benzo[e]furo[3,4-c][1,2]thiazin-1(3H)-one 5-oxide (**3aa**). 12 h, 82% yield.  $^1\text{H}$  NMR (400 MHz,  $\text{CDCl}_3$ )  $\delta$  8.58 (d,  $J = 8.0$  Hz, 1H), 7.89-7.81 (m, 2H), 7.74-7.62 (m, 4H), 7.46-7.44 (m, 1H), 7.39-7.35 (m, 1H), 1.66 (s, 3H), 1.65 (s, 3H) ppm.  $^{13}\text{C}$  NMR (101 MHz,  $\text{CDCl}_3$ )  $\delta$  172.51, 168.7, 138.6, 133.5, 132.9, 130.3, 128.5, 127.3, 126.6, 124.7, 122.0, 118.0, 91.9, 82.3, 24.1, 23.7 ppm. ESI HRMS: calcd. for  $\text{C}_{18}\text{H}_{15}\text{NO}_3\text{S}+\text{Na}$  348.0670, found 348.0676.

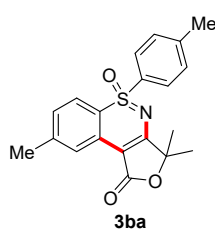

3,3,8-trimethyl-5-(p-tolyl)-5 $\lambda^4$ -benzo[e]furo[3,4-c][1,2]thiazin-1(3H)-one 5-oxide (**3ba**). 12 h, 85% yield.  $^1\text{H}$  NMR (400 MHz,  $\text{CDCl}_3$ )  $\delta$  8.36 (s, 1H), 7.68 (d,  $J = 8.0$  Hz, 2H), 7.40 (d,  $J = 8.0$  Hz, 2H), 7.33 (d,  $J = 8.4$  Hz, 1H), 7.16 (d,  $J = 8.4$  Hz, 1H), 2.47 (s, 3H), 2.44 (s, 3H), 1.63 (s, 6H) ppm.  $^{13}\text{C}$  NMR (101 MHz,  $\text{CDCl}_3$ )  $\delta$  173.8, 169.9, 145.7, 145.2, 137.0, 131.3, 130.1, 128.8, 128.2, 125.7, 122.8, 116.6, 92.6, 83.2, 25.1, 24.8, 22.0, 21.7 ppm. ESI HRMS: calcd. for  $\text{C}_{20}\text{H}_{19}\text{NO}_3\text{S}+\text{H}$  354.1164, found 354.1158.

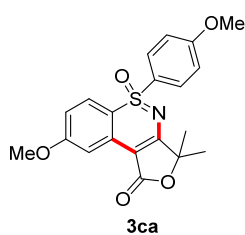

8-methoxy-5-(4-methoxyphenyl)-3,3-dimethyl-5 $\lambda^4$ -benzo[e]furo[3,4-c][1,2]thiazin-1(3H)-one 5-oxide (**3ca**). 14 h, 84% yield.  $^1\text{H}$  NMR (400 MHz,  $\text{CDCl}_3$ )  $\delta$  7.98 (d,  $J = 2.8$  Hz, 1H), 7.71 (d,  $J = 8.8$  Hz, 2H), 7.34 (d,  $J = 9.2$  Hz, 1H), 7.05 (d,  $J = 9.0$  Hz, 2H), 6.88 (dd,  $J_1 = 2.4$  Hz,  $J_2 = 8.8$  Hz, 1H), 3.92 (s, 3H), 3.89 (s, 3H), 1.62 (s, 6H) ppm.  $^{13}\text{C}$  NMR (101 MHz,  $\text{CDCl}_3$ )  $\delta$  174.2, 169.9, 164.2, 163.6, 133.9, 131.5, 130.3, 127.6, 117.2,

114.7, 111.6, 103.7, 92.5, 83.2, 55.9, 55.9, 25.1, 24.8 ppm. ESI HRMS: calcd. for  $\text{C}_{20}\text{H}_{19}\text{NO}_5\text{S}+\text{H}$  386.1062, found 386.1058.

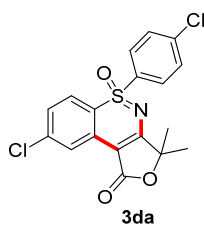

found 394.0070.

8-chloro-5-(4-chlorophenyl)-3,3-dimethyl-5 $\lambda^4$ -benzo[e]furo[3,4-c][1,2]thiazin-1(3H)-one 5-oxide (**3da**). 12 h, 80% yield.  $^1\text{H}$  NMR (400 MHz,  $\text{CDCl}_3$ )  $\delta$  8.58 (d,  $J = 1.6$  Hz, 1H), 7.75 (d,  $J = 8.8$  Hz, 2H), 7.62 (d,  $J = 8.4$  Hz, 2H), 7.39-7.32 (m, 2H), 1.64 (s, 3H), 1.63 (s, 3H) ppm.  $^{13}\text{C}$  NMR (101 MHz,  $\text{CDCl}_3$ )  $\delta$  174.2, 169.1, 141.9, 141.3, 137.9, 132.8, 130.1, 129.6, 128.3, 127.2, 122.8, 116.7, 92.7, 83.5, 25.1, 24.7 ppm. ESI HRMS: calcd. for  $\text{C}_{18}\text{H}_{13}\text{Cl}_2\text{NO}_3\text{S}+\text{H}$  394.0071,

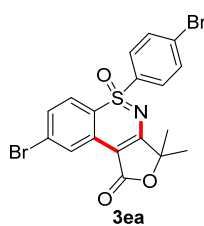

found 481.9064.

8-bromo-5-(4-bromophenyl)-3,3-dimethyl-5 $\lambda^4$ -benzo[e]furo[3,4-c][1,2]thiazin-1(3H)-one 5-oxide (**3ea**). 12 h, 66% yield.  $^1\text{H}$  NMR (400 MHz,  $\text{CDCl}_3$ )  $\delta$  8.71 (d,  $J = 1.6$  Hz, 1H), 7.75 (d,  $J = 8.8$  Hz, 2H), 7.63 (d,  $J = 8.8$  Hz, 2H), 7.46 (dd,  $J_1 = 1.6$  Hz,  $J_2 = 8.4$  Hz, 1H), 7.26-7.22 (m, 1H), 1.59 (s, 6H) ppm.  $^{13}\text{C}$  NMR (101 MHz,  $\text{CDCl}_3$ )  $\delta$  174.2, 169.0, 138.4, 133.1, 132.7, 131.1, 130.6, 130.0, 129.6, 127.1, 125.9, 117.1, 92.5, 83.5, 25.1, 24.7 ppm. ESI HRMS: calcd. for  $\text{C}_{18}\text{H}_{13}\text{Br}_2\text{NO}_3\text{S}+\text{H}$  481.9061, found 481.9064.

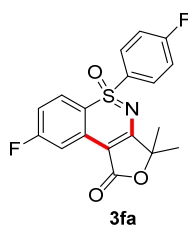

found 362.0658.

8-fluoro-5-(4-fluorophenyl)-3,3-dimethyl-5 $\lambda^4$ -benzo[e]furo[3,4-c][1,2]thiazin-1(3H)-one 5-oxide (**3fa**). 14 h, 87% yield.  $^1\text{H}$  NMR (400 MHz,  $\text{CDCl}_3$ )  $\delta$  8.26 (dd,  $J_1 = 2.4$  Hz,  $J_2 = 10.0$  Hz, 1H), 7.86-7.83 (m, 2H), 7.47 (dd,  $J_1 = 5.2$  Hz,  $J_2 = 9.2$  Hz, 1H), 7.33 (t,  $J = 8.4$  Hz, 2H), 7.12-7.07 (m, 1H), 1.64 (s, 6H) ppm.  $^{13}\text{C}$  NMR (101 MHz,  $\text{CDCl}_3$ )  $\delta$  174.2, 169.2, 167.6, 167.0, 165.0, 164.4, 135.6, 134.3 (d,  $J = 12.0$  Hz), 131.2 (d,  $J = 10.0$  Hz), 128.8 (d,  $J = 10.5$  Hz), 117.3, 117.0,

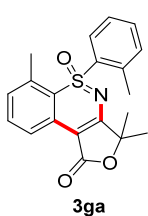

found 354.1170.

3,3,6-trimethyl-5-(o-tolyl)-5 $\lambda^4$ -benzo[e]furo[3,4-c][1,2]thiazin-1(3H)-one 5-oxide (**3ga**). 17 h, 47% yield.  $^1\text{H}$  NMR (400 MHz,  $\text{CDCl}_3$ )  $\delta$  8.60 (d,  $J = 8.4$  Hz, 1H), 8.35 (d,  $J = 7.6$  Hz, 1H), 7.64-7.53 (m, 3H), 7.28 (t,  $J = 7.6$  Hz, 1H), 7.17 (d,  $J = 7.6$  Hz, 1H), 2.12 (s, 3H), 1.70 (s, 3H), 1.61 (s, 3H), 1.58 (s, 3H) ppm.  $^{13}\text{C}$  NMR (101 MHz,  $(\text{CD}_3)_2\text{CO}$ )  $\delta$  172.2, 168.7, 139.2, 138.9, 136.2, 135.0, 134.2, 133.5, 132.9, 130.9, 128.3, 126.9, 120.5, 116.8, 91.6, 81.8, 24.4, 24.2, 19.5, 18.1 ppm. ESI HRMS: calcd. for  $\text{C}_{20}\text{H}_{19}\text{NO}_3\text{S}+\text{H}$  354.1164, found 354.1170.

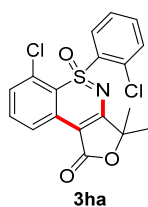

found 394.0069.

6-chloro-5-(2-chlorophenyl)-3,3-dimethyl-5 $\lambda^4$ -benzo[e]furo[3,4-c][1,2]thiazin-1(3H)-one 5-oxide (**3ha**). 12 h, 26% yield.  $^1\text{H}$  NMR (400 MHz,  $\text{CDCl}_3$ )  $\delta$  8.65 (d,  $J = 8.4$  Hz, 1H), 8.52-8.49 (m, 1H), 7.67-7.64 (m, 3H), 7.49 (d,  $J = 8.8$  Hz, 1H), 7.35 (d,  $J = 7.6$  Hz, 1H), 1.60 (s, 3H), 1.57 (s, 3H) ppm.  $^{13}\text{C}$  NMR (101 MHz,  $\text{CDCl}_3$ )  $\delta$  173.4, 169.6, 137.5, 135.7, 135.7, 135.2, 134.9, 132.2, 131.2, 131.0, 129.4, 127.3, 121.8, 114.9, 92.2, 83.0, 24.9, 24.7 ppm. ESI HRMS: calcd. for  $\text{C}_{18}\text{H}_{13}\text{Cl}_2\text{NO}_3\text{S}+\text{H}$  394.0071, found 394.0069.

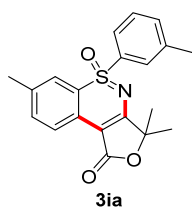

3,3,7-trimethyl-5-(m-tolyl)-5 $\lambda^4$ -benzo[e]furo[3,4-c][1,2]thiazin-1(3H)-one 5-oxide (**3ia**). 12 h, 80% yield. <sup>1</sup>H NMR (400 MHz, CDCl<sub>3</sub>)  $\delta$  8.45 (d,  $J$  = 8.0 Hz, 1H), 7.62-7.60 (m, 2H), 7.53-7.47 (m, 3H), 7.22 (s, 1H), 2.46 (s, 3H), 2.33 (s, 3H), 1.64 (s, 3H), 1.63 (s, 3H) ppm. <sup>13</sup>C NMR (101 MHz, CDCl<sub>3</sub>)  $\delta$  172.8, 169.9, 140.0, 139.7, 137.9, 135.4, 135.2, 129.4, 128.9, 128.4, 125.5, 125.1, 123.0, 118.9, 92.9, 83.3, 25.1, 24.8, 21.5 ppm. ESI HRMS: calcd. for C<sub>20</sub>H<sub>19</sub>NO<sub>3</sub>S+H 354.1164, found 354.1163.

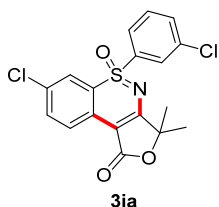

7-chloro-5-(3-chlorophenyl)-3,3-dimethyl-5 $\lambda^4$ -benzo[e]furo[3,4-c][1,2]thiazin-1(3H)-one 5-oxide (**3ja**). 12 h, 78% yield. <sup>1</sup>H NMR (400 MHz, CDCl<sub>3</sub>)  $\delta$  8.56 (d,  $J$  = 8.4 Hz, 1H), 7.82 (t,  $J$  = 1.6 Hz, 1H), 7.73-7.70 (m, 2H), 7.66-7.59 (m, 2H), 7.40 (d,  $J$  = 2.0 Hz, 1H), 1.66 (s, 3H), 1.64 (s, 3H) ppm. <sup>13</sup>C NMR (101 MHz, CDCl<sub>3</sub>)  $\delta$  173.2, 169.2, 140.8, 136.2, 135.0, 134.9, 133.2, 131.0, 129.8, 128.3, 126.5, 125.0, 125.0, 119.4, 93.3, 83.6, 25.1, 24.7 ppm. ESI HRMS: calcd. for C<sub>18</sub>H<sub>13</sub>Cl<sub>2</sub>NO<sub>3</sub>S+Na 415.9891, found 415.9892.

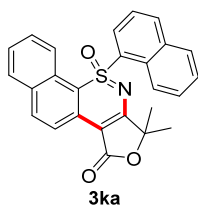

1,1-dimethyl-10-(naphthalen-1-yl)-10 $\lambda^4$ -furo[3,4-c]naphtho[2,1-e][1,2]thiazin-3(1H)-one 10-oxide (**3ka**). 13 h, 42 yield. <sup>1</sup>H NMR (400 MHz, CDCl<sub>3</sub>)  $\delta$  8.90 (d,  $J$  = 8.8 Hz, 1H), 8.84 (d,  $J$  = 7.2 Hz, 1H), 8.19 (t,  $J$  = 8.0 Hz, 2H), 8.11 (d,  $J$  = 9.2 Hz, 1H), 7.90 (d,  $J$  = 8.4 Hz, 1H), 7.80 (t,  $J$  = 8.4 Hz, 2H), 7.45 (t,  $J$  = 7.2 Hz, 1H), 7.40-7.36 (m, 1H), 7.33-7.29 (m, 2H), 6.81 (d,  $J$  = 8.4 Hz, 1H), 1.66 (s, 3H), 1.49 (s, 3H) ppm. <sup>13</sup>C NMR (101 MHz, CDCl<sub>3</sub>)  $\delta$  174.0, 170.0, 136.3, 135.8, 134.5, 134.3, 132.7, 130.5, 129.5, 129.5, 129.4, 128.7, 128.6, 127.6, 127.1, 126.3, 124.0, 122.9, 121.9, 120.6, 92.4, 83.0, 25.1, 24.9 ppm. ESI HRMS: calcd. for C<sub>26</sub>H<sub>19</sub>NO<sub>3</sub>S+H 426.1164, found 426.1171.

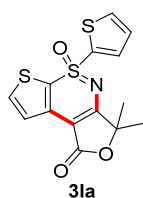

3,3-dimethyl-5-(thiophen-2-yl)-5 $\lambda^4$ -furo[3,4-c]thieno[3,2-e][1,2]thiazin-1(3H)-one 5-oxide (**3la**). 12 h, 27% yield. <sup>1</sup>H NMR (400 MHz, CDCl<sub>3</sub>)  $\delta$  7.90 (d,  $J$  = 5.2 Hz, 1H), 7.87 (d,  $J$  = 5.2 Hz, 1H), 7.77 (d,  $J$  = 5.2 Hz, 1H), 7.65 (d,  $J$  = 2.8 Hz, 1H), 7.23 (t,  $J$  = 4.8 Hz, 1H), 1.67 (s, 3H), 1.66 (s, 3H) ppm. <sup>13</sup>C NMR (101 MHz, CDCl<sub>3</sub>)  $\delta$  172.7, 168.6, 142.4, 141.3, 137.0, 135.0, 134.4, 128.5, 122.5, 115.5, 95.8, 84.1, 25.2, 24.9 ppm. ESI HRMS: calcd. for C<sub>14</sub>H<sub>11</sub>NO<sub>3</sub>S<sub>3</sub>+H 337.9979, found 337.9978.

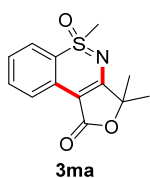

3,3,5-trimethyl-5 $\lambda^4$ -benzo[e]furo[3,4-c][1,2]thiazin-1(3H)-one 5-oxide (**3ma**). 12 h, 59% yield. <sup>1</sup>H NMR (400 MHz, CDCl<sub>3</sub>)  $\delta$  8.52 (d,  $J$  = 8.0 Hz, 1H), 7.87 (d,  $J$  = 8.0 Hz, 1H), 7.74 (t,  $J$  = 7.6 Hz, 1H), 7.53 (t,  $J$  = 7.6 Hz, 1H), 3.57 (s, 3H), 1.574 (s, 3H), 1.571 (s, 3H) ppm. <sup>13</sup>C NMR (101 MHz, CDCl<sub>3</sub>)  $\delta$  173.5, 169.6, 134.6, 131.4, 127.6, 124.4, 123.4, 117.8, 93.0, 83.0, 46.6, 25.0, 24.7 ppm. ESI HRMS: calcd. for C<sub>13</sub>H<sub>13</sub>NO<sub>3</sub>S+H 264.0694, found 264.0694.



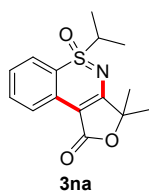

5-isopropyl-3,3-dimethyl-5 $\lambda^4$ -benzo[*e*]furo[3,4-*c*][1,2]thiazin-1(3H)-one 5-oxide (**3na**). 12 h, 68% yield. <sup>1</sup>H NMR (400 MHz, CDCl<sub>3</sub>)  $\delta$  8.48 (d, *J* = 8.0 Hz, 1H), 7.78 (d, *J* = 8.0 Hz, 1H), 7.73 (t, *J* = 7.6 Hz, 1H), 7.49 (t, *J* = 7.6 Hz, 1H), 3.78-3.71 (m, 1H), 1.60 (s, 3H), 1.56 (s, 3H), 1.47 (d, *J* = 6.8 Hz, 3H), 1.14 (d, *J* = 6.8 Hz, 3H) ppm. <sup>13</sup>C NMR (101 MHz, CDCl<sub>3</sub>)  $\delta$  174.3, 168.7, 133.8, 132.3, 126.4, 124.3, 122.1, 113.0, 91.3, 82.0, 59.2, 24.2, 23.7, 15.2, 12.3 ppm. ESI HRMS: calcd. for C<sub>15</sub>H<sub>17</sub>NO<sub>3</sub>S+H 292.1007, found 292.1006.

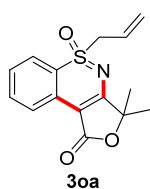

5-allyl-3,3-dimethyl-5 $\lambda^4$ -benzo[*e*]furo[3,4-*c*][1,2]thiazin-1(3H)-one 5-oxide (**3oa**). 13 h, 14% yield. <sup>1</sup>H NMR (400 MHz, CDCl<sub>3</sub>)  $\delta$  8.48 (d, *J* = 8.0 Hz, 1H), 7.81 (d, *J* = 8.0 Hz, 1H), 7.73 (t, *J* = 7.6 Hz, 1H), 7.50 (t, *J* = 7.6 Hz, 1H), 5.53-5.45 (m, 1H), 5.33 (dd, *J*<sub>1</sub> = 10.0, *J*<sub>2</sub> = 22.0 Hz, 2H), 4.33-4.28 (m, 1H), 4.19-4.13 (m, 1H), 1.58 (s, 3H), 1.56 (s, 3H). <sup>13</sup>C NMR (101 MHz, CDCl<sub>3</sub>)  $\delta$  174.8, 169.6, 134.9, 132.9, 127.5, 127.3, 125.2, 123.2, 122.6, 115.3, 92.6, 83.1, 63.5, 25.2, 24.8 ppm. ESI HRMS: calcd. for C<sub>15</sub>H<sub>15</sub>NO<sub>3</sub>S+Na 312.0670, found 312.0669.

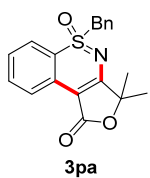

5-benzyl-3,3-dimethyl-5 $\lambda^4$ -benzo[*e*]furo[3,4-*c*][1,2]thiazin-1(3H)-one 5-oxide (**3pa**). 13 h, 70% yield. <sup>1</sup>H NMR (400 MHz, CDCl<sub>3</sub>)  $\delta$  8.30 (d, *J* = 8.0 Hz, 1H), 7.75 (d, *J* = 8.0 Hz, 1H), 7.65 (t, *J* = 7.6 Hz, 1H), 7.44 (t, *J* = 7.6 Hz, 1H), 7.24-7.22 (m, 1H), 7.13 (t, *J* = 7.6 Hz, 2H), 6.94 (d, *J* = 7.2 Hz, 2H), 4.79 (d, *J* = 14.0 Hz, 1H), 4.56 (d, *J* = 14.0 Hz, 1H), 1.48 (s, 3H), 1.44 (s, 3H) ppm. <sup>13</sup>C NMR (101 MHz, CDCl<sub>3</sub>)  $\delta$  174.5, 169.4, 135.0, 133.2, 131.1, 129.7, 128.8, 127.3, 126.0, 125.7, 123.0, 114.6, 92.2, 82.9, 65.8, 25.0, 24.8 ppm. ESI HRMS: calcd. for C<sub>19</sub>H<sub>17</sub>NO<sub>3</sub>S+H 340.1007, found 340.1010.

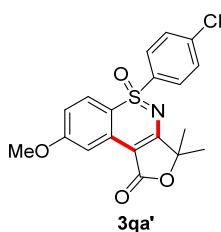

5-(4-chlorophenyl)-8-methoxy-3,3-dimethyl-5 $\lambda^4$ -benzo[*e*]furo[3,4-*c*][1,2]thiazin-1(3H)-one 5-oxide (**3qa'**). 13 h, 29% yield. <sup>1</sup>H NMR (400 MHz, CDCl<sub>3</sub>)  $\delta$  8.00 (s, 1H), 7.71 (d, *J* = 8.0 Hz, 2H), 7.57 (d, *J* = 8.4 Hz, 2H), 7.36 (d, *J* = 8.8 Hz, 1H), 6.92 (d, *J* = 8.0 Hz, 1H), 3.94 (s, 3H) ppm. <sup>13</sup>C NMR (101 MHz, CDCl<sub>3</sub>)  $\delta$  174.0, 169.7, 164.1, 141.1, 139.3, 134.3, 129.8, 129.2, 127.7, 117.5, 110.3, 104.1, 92.8, 83.2, 56.0, 25.1, 24.8 ppm. ESI HRMS: calcd. for C<sub>19</sub>H<sub>16</sub>ClNO<sub>3</sub>S+H 390.0567, found 390.0564.

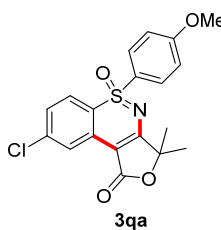

8-chloro-5-(4-methoxyphenyl)-3,3-dimethyl-5 $\lambda^4$ -benzo[*e*]furo[3,4-*c*][1,2]thiazin-1(3H)-one 5-oxide (**3qa**). 13 h, 58% yield. <sup>1</sup>H NMR (400 MHz, CDCl<sub>3</sub>)  $\delta$  8.49 (s, 1H), 7.67 (d, *J* = 8.8 Hz, 2H), 7.30-7.20 (m, 2H), 7.02 (d, *J* = 8.8 Hz, 2H), 3.85 (s, 3H) ppm. <sup>13</sup>C NMR (101 MHz, CDCl<sub>3</sub>)  $\delta$  174.4, 169.4, 164.7, 140.6, 132.4, 130.7, 130.0, 127.9, 127.1, 122.5, 117.8, 115.0, 92.4, 83.5, 56.0, 25.1, 24.7 ppm. ESI HRMS: calcd. for C<sub>19</sub>H<sub>16</sub>ClNO<sub>3</sub>S+H 390.0567, found 390.0565.

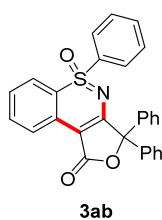

3,3,5-triphenyl-5 $\lambda^4$ -benzo[*e*]furo[3,4-*c*][1,2]thiazin-1(3H)-one 5-oxide (**3ab**). 14 h, 24% yield. <sup>1</sup>H NMR (400 MHz, CDCl<sub>3</sub>)  $\delta$  8.64 (dd,  $J_1 = 1.1$  Hz,  $J_2 = 8.2$  Hz, 1H), 7.71-7.59 (m, 8H), 7.55-7.46 (m, 3H), 7.42-7.30 (m, 7H) ppm. <sup>13</sup>C NMR (151 MHz, cdcl<sub>3</sub>)  $\delta$  166.7, 165.6, 135.7, 135.5, 135.1, 130.4, 130.0, 126.8, 125.4, 124.5, 124.3, 124.3, 124.2, 124.1, 124.0, 123.5, 122.8, 121.6, 119.3, 114.9, 90.5, 84.2 ppm. ESI HRMS: calcd. for C<sub>28</sub>H<sub>19</sub>NO<sub>3</sub>S+H 450.1164, found 450.1159.

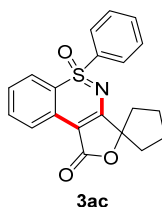

5-phenyl-1H-5 $\lambda^6$ -spiro[benzo[*e*]furo[3,4-*c*][1,2]thiazine-3,1'-cyclopentan]-1-one 5-oxide (**3ac**). 14 h, 67% yield. <sup>1</sup>H NMR (400 MHz, CDCl<sub>3</sub>)  $\delta$  8.56 (d,  $J = 8.2$  Hz, 1H), 7.89-7.81 (m, 2H), 7.73-7.61 (m, 4H), 7.45-7.43 (m, 1H), 7.38-7.34 (m, 1H), 2.29-2.26 (m, 2H), 2.04-2.01 (m, 4H), 1.91-1.87 (m, 2H) ppm. <sup>13</sup>C NMR (101 MHz, CDCl<sub>3</sub>)  $\delta$  171.5, 169.9, 139.7, 134.4, 133.9, 131.2, 129.5, 128.4, 127.5, 125.7, 123.0, 119.1, 94.2, 93.4, 37.6, 37.0, 25.4, 25.4 ppm. ESI HRMS: calcd. for C<sub>20</sub>H<sub>17</sub>NO<sub>3</sub>S+H 352.1007, found 352.1003.

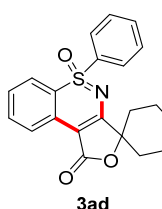

5-phenyl-1H-5 $\lambda^6$ -spiro[benzo[*e*]furo[3,4-*c*][1,2]thiazine-3,1'-cyclohexan]-1-one 5-oxide (**3ad**). 14 h, 91% yield. <sup>1</sup>H NMR (400 MHz, CDCl<sub>3</sub>)  $\delta$  8.58 (d,  $J = 8.0$  Hz, 1H), 7.84-7.82 (m, 2H), 7.72-7.60 (m, 4H), 7.45-7.43 (m, 1H), 7.37-7.33 (m, 1H), 2.07-1.94 (m, 2H), 1.89-1.71 (m, 7H), 1.34-1.23 (m, 1H) ppm. <sup>13</sup>C NMR (101 MHz, CDCl<sub>3</sub>)  $\delta$  173.6, 170.1, 139.8, 134.4, 133.9, 131.5, 129.5, 128.3, 127.4, 125.8, 123.1, 119.2, 93.3, 84.9, 33.8, 33.5, 24.6, 21.9, 21.8 ppm. ESI HRMS: calcd. for C<sub>21</sub>H<sub>19</sub>NO<sub>3</sub>S+H 366.1164, found 366.1169.

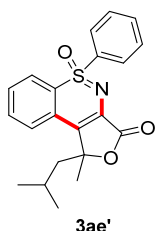

1-isobutyl-1-methyl-5-phenyl-5 $\lambda^4$ -benzo[*e*]furo[3,4-*c*][1,2]thiazin-3(1H)-one 5-oxide (**3ae'**). 12 h, 35% yield. <sup>1</sup>H NMR (400 MHz, CDCl<sub>3</sub>)  $\delta$  8.60 (d,  $J = 8.0$  Hz, 1H), 7.85 (d,  $J = 7.6$  Hz, 2H), 7.74-7.62 (m, 4H), 7.42-7.35 (m, 2H), 1.96 (dd,  $J_1 = 5.8$  Hz,  $J_2 = 14.5$  Hz, 1H), 1.81 (dd,  $J_1 = 6.2$  Hz,  $J_2 = 14.5$  Hz, 1H), 1.76-1.68 (m, 1H), 1.61 (s, 3H), 0.96 (d,  $J = 6.6$  Hz, 3H), 0.88 (d,  $J = 6.6$  Hz, 3H) ppm. <sup>13</sup>C NMR (101 MHz, CDCl<sub>3</sub>)  $\delta$  172.9, 170.0, 139.3, 134.5, 134.0, 131.3, 129.5, 128.5, 127.5, 125.7, 123.1, 118.8, 94.1, 85.9, 45.3, 24.9, 24.4, 24.3, 23.9 ppm. ESI HRMS: calcd. for C<sub>21</sub>H<sub>21</sub>KNO<sub>3</sub>S+H 406.0879, found 406.0942.

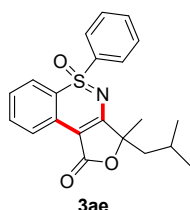

3-isobutyl-3-methyl-5-phenyl-5 $\lambda^4$ -benzo[*e*]furo[3,4-*c*][1,2]thiazin-1(3H)-one 5-oxide (**3ae**). 12 h, 35% yield. <sup>1</sup>H NMR (400 MHz, CDCl<sub>3</sub>)  $\delta$  8.59 (d,  $J = 8.0$  Hz, 1H), 7.86 – 7.84 (m, 2H), 7.74 – 7.62 (m, 4H), 7.43 (d,  $J = 7.6$  Hz, 1H), 7.40 – 7.31 (m, 1H), 2.00 – 1.91 (m, 1H), 1.82 (t,  $J = 7.0$  Hz, 1H), 1.74 (dd,  $J_1 = 6.6$  Hz,  $J_2 = 13.0$  Hz, 1H), 1.62 (s, 3H), 0.95 (d,  $J = 6.4$  Hz, 3H), 0.92 (d,  $J = 6.4$  Hz, 3H) ppm. <sup>13</sup>C NMR (151 MHz, cdcl<sub>3</sub>)  $\delta$  169.1, 166.0, 135.4, 130.4, 129.9, 127.1, 125.5, 124.4, 123.5, 121.6, 119.0, 114.9, 90.0, 81.8, 42.0, 20.3, 20.1, 19.7 ppm. ESI HRMS: calcd. for C<sub>21</sub>H<sub>21</sub>NO<sub>3</sub>S+H 368.1320, found 368.1324.

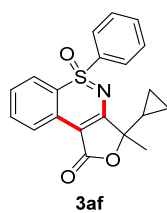

3-cyclopropyl-3-methyl-5-phenyl-5 $\lambda^4$ -benzo[e]furo[3,4-c][1,2]thiazin-1(3H)-one 5-oxide (**3af**). 12 h, 63% yield.  $^1\text{H}$  NMR (400 MHz,  $\text{CDCl}_3$ )  $\delta$  8.54 (t,  $J = 8.0$  Hz, 1H), 7.87-7.82 (m, 2H), 7.74-7.58 (m, 4H), 7.54-7.35 (m, 1H), 7.39-7.35 (m, 1H), 1.70 (s, 3H), 1.47-1.36 (m, 1H), 0.71-0.56 (m, 2H), 0.51-0.36 (m, 2H) ppm.  $^{13}\text{C}$  NMR (101 MHz,  $\text{CDCl}_3$ )  $\delta$  171.7, 171.5, 168.4, 168.4, 138.3, 137.9, 132.7, 132.7, 132.3, 132.2, 130.7, 129.5, 127.8, 127.6, 126.6, 126.4, 125.8, 125.8, 124.4, 124.1, 124.0, 121.3, 117.3, 117.3, 91.5, 91.3, 81.9, 81.7, 21.8, 21.5, 16.4, 16.1, -1.1, -1.5 ppm. ESI HRMS: calcd. for  $\text{C}_{20}\text{H}_{17}\text{NO}_3\text{S}+\text{H}$  352.1007, found 352.1005.

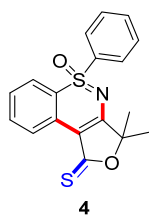

3,3-dimethyl-5-phenyl-5 $\lambda^4$ -benzo[e]furo[3,4-c][1,2]thiazine-1(3H)-thione 5-oxide (**4**). 24 h, 88% yield.  $^1\text{H}$  NMR (400 MHz,  $\text{CDCl}_3$ )  $\delta$  9.75 (d,  $J = 8.4$  Hz, 1H), 7.82 (d,  $J = 7.2$  Hz, 2H), 7.76-7.70 (m, 2H), 7.64 (t,  $J = 7.6$  Hz, 2H), 7.49 (d,  $J = 6.8$  Hz, 1H), 7.42 (t,  $J = 8.0$  Hz, 1H), 1.69 (s, 3H), 1.68 (s, 3H) ppm.  $^{13}\text{C}$  NMR (101 MHz,  $\text{CDCl}_3$ )  $\delta$  206.3, 175.6, 139.4, 134.7, 134.1, 131.6, 129.7, 128.1, 128.0, 126.1, 123.4, 119.0, 105.4, 90.6, 24.6, 24.3 ppm. ESI HRMS: calcd. for  $\text{C}_{18}\text{H}_{15}\text{NO}_2\text{S}_2+\text{H}$  342.0622, found 342.0618.

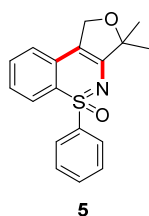

3,3-dimethyl-5-phenyl-1,3-dihydrobenzo[e]furo[3,4-c][1,2]thiazine 5-oxide (**5**). 24 h, 64% yield.  $^1\text{H}$  NMR (400 MHz,  $\text{CDCl}_3$ )  $\delta$  7.88 (d,  $J = 7.6$  Hz, 2H), 7.60 (t,  $J = 7.6$  Hz, 1H), 7.53 (t,  $J = 7.6$  Hz, 2H), 7.44 (t,  $J = 7.6$  Hz, 1H), 7.28 (d,  $J = 8.0$  Hz, 1H), 7.19-7.14 (m,  $J = 1$  Hz), 7.01 (d,  $J = 8.0$  Hz, 1H), 5.03 (d,  $J = 2.4$  Hz, 2H), 1.461 (s, 3H), 1.455 (s, 3H) ppm.  $^{13}\text{C}$  NMR (101 MHz,  $\text{CDCl}_3$ )  $\delta$  153.2, 139.9, 133.8, 132.6, 131.8, 129.3, 129.1, 125.8, 125.8, 122.3, 119.0, 101.4, 86.5, 69.5, 26.5, 25.8 ppm. ESI HRMS: calcd. for  $\text{C}_{18}\text{H}_{17}\text{NO}_2\text{S}+\text{Na}$  334.0878, found 334.0853.

## Reference

- [1] Y. M. Li, C. P. Nie, H. F. Wang, X. Y. Li, F. Verpoort and C. Y. Duan, *Eur. J. Org. Chem.*, **2011**, 7331.
- [2] M. Zenzola, R. Doran, L. Degennaro, R. Luisi and J. A. Bull, *Angew. Chem. Int. Ed.*, **2016**, 55, 7203.
- [3] M. Harmata, N. K. O. Rayanil, M. G. Gomes, P. Zheng, N. L. Calkins, S. Y. Kim, Y. Fan, V. Bumbu, D. Y. Lee, S. Wacharasindhu and X. Hong, *Org. Lett.*, **2005**, 7, 143.
- [4] G. Liao, H. Song, X. S. Yin and B. F. Shi, *Chem. Commun.*, **2017**, 53, 7824.
- [5] Y. S. Xu, B. Li, X. Y. Zhang and X. S. Fan, *Adv. Synth. Catal.*, **2018**, 360, 2613.

## 6. $^1\text{H}$ and $^{13}\text{C}$ NMR spectra.

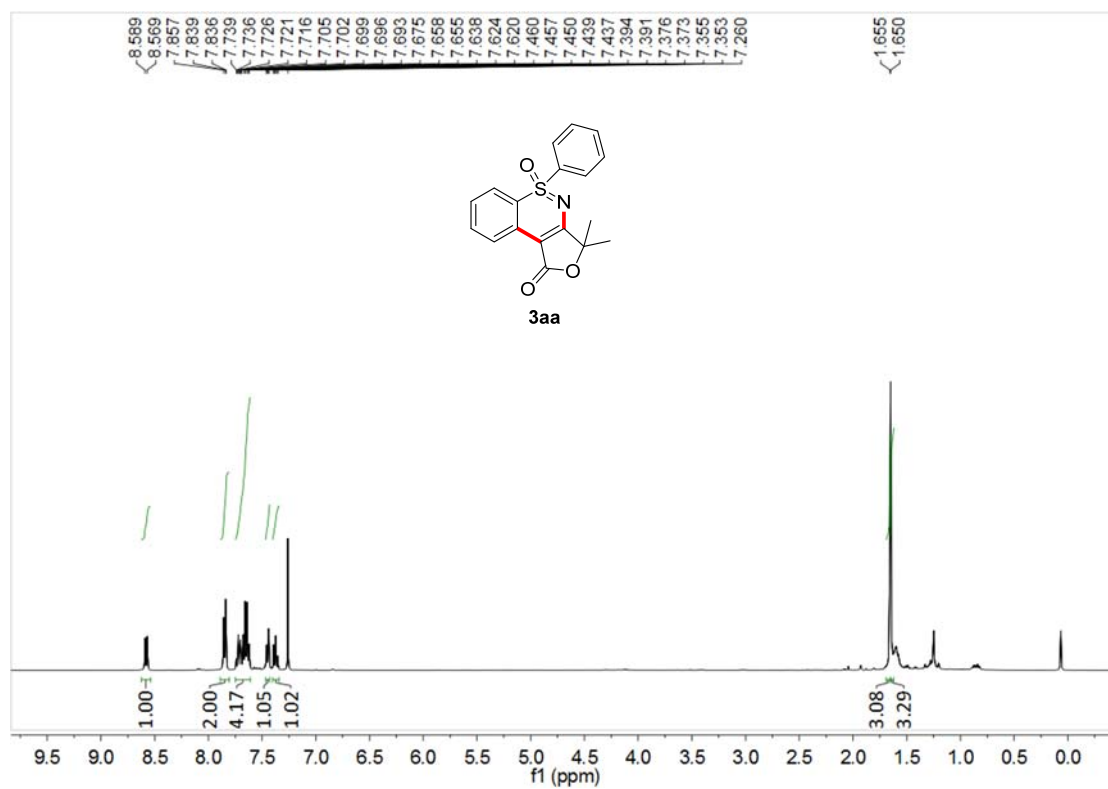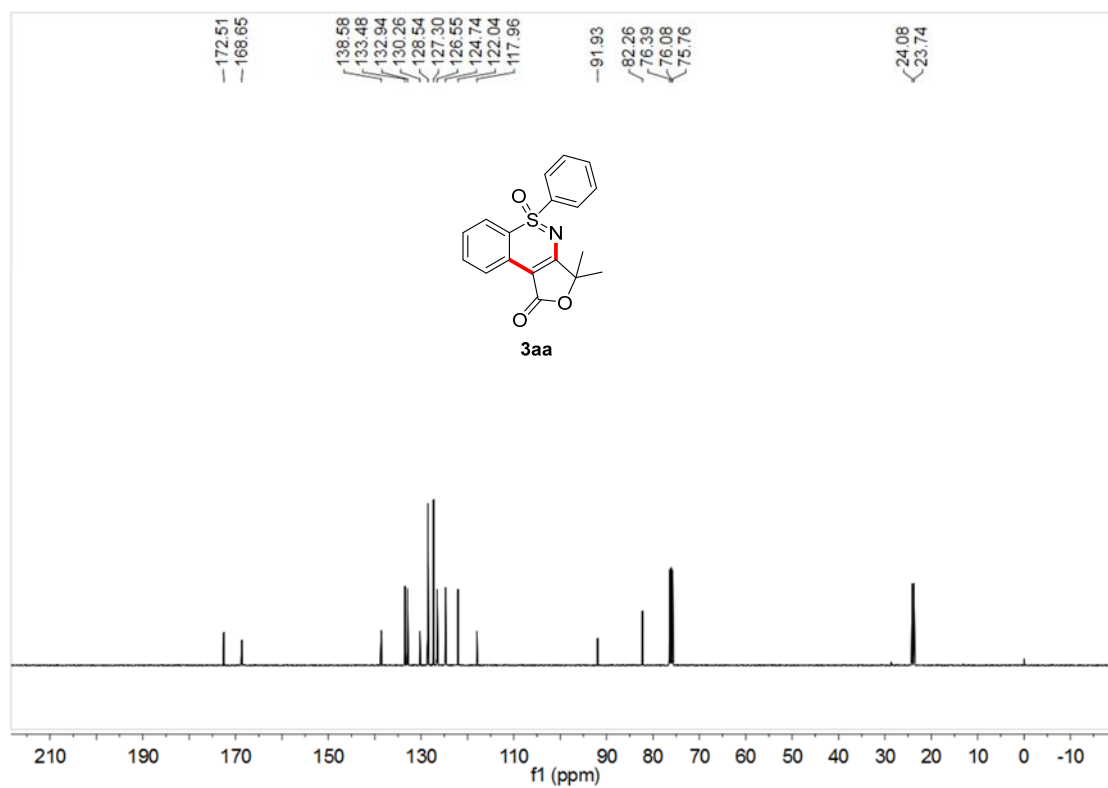

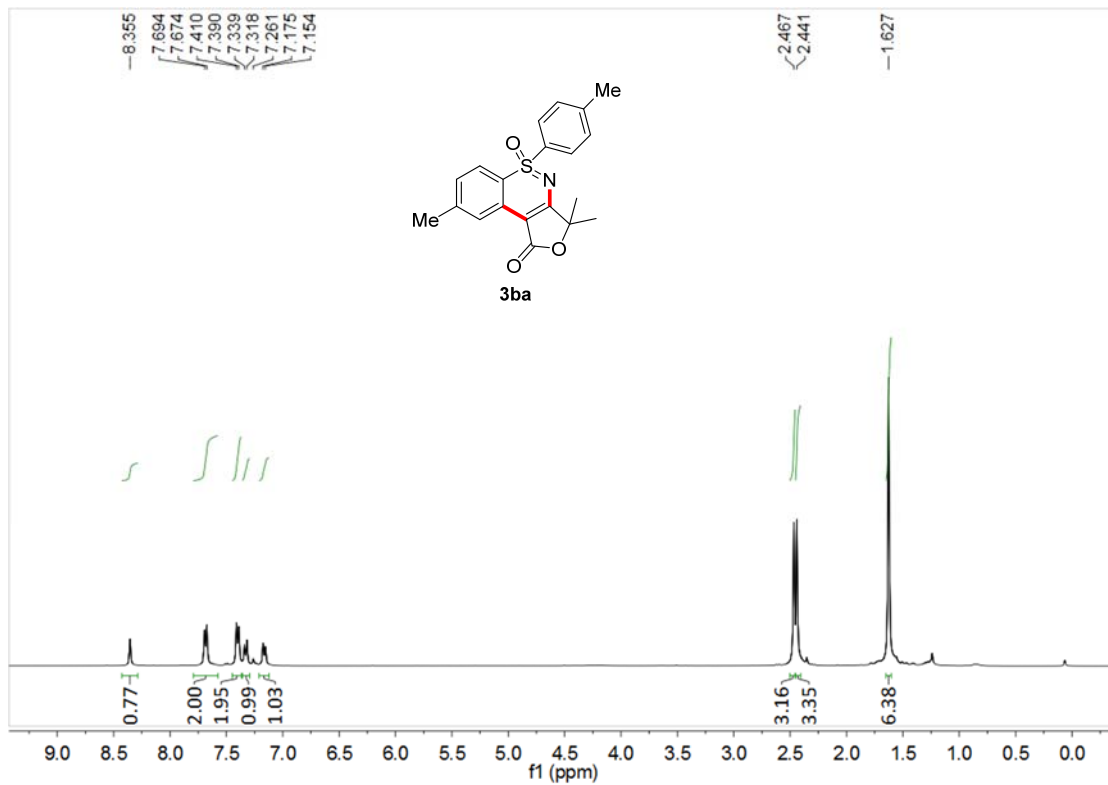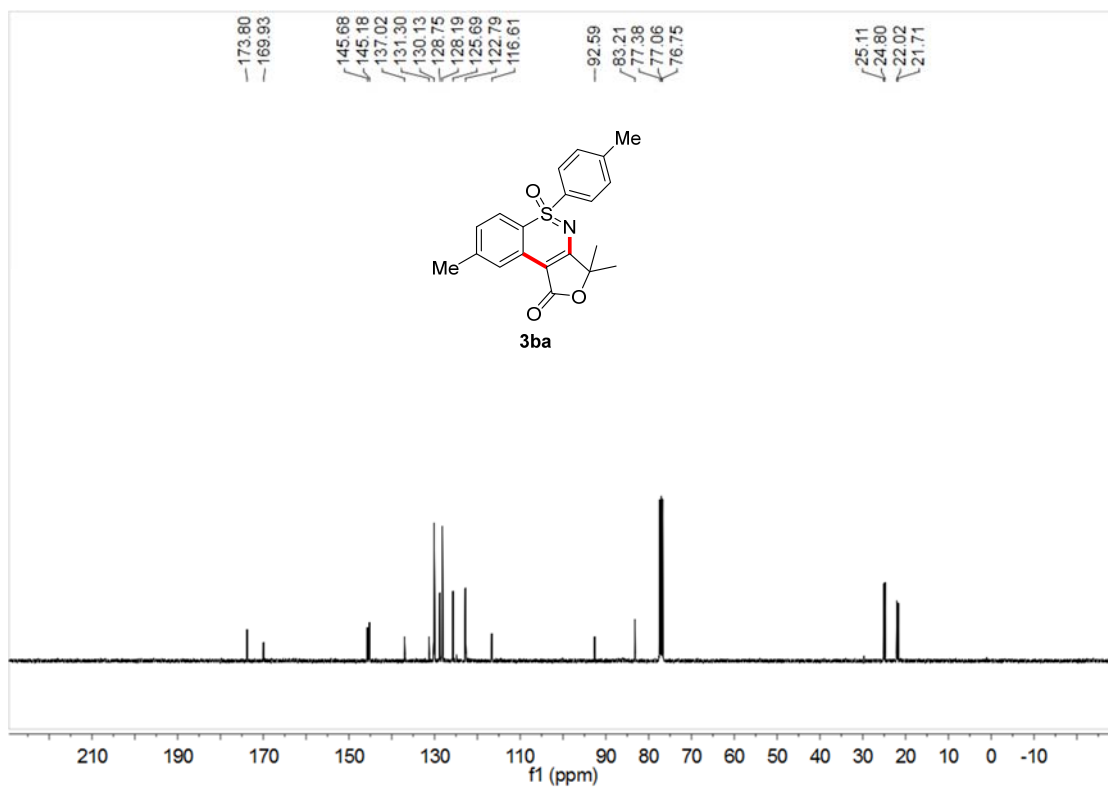

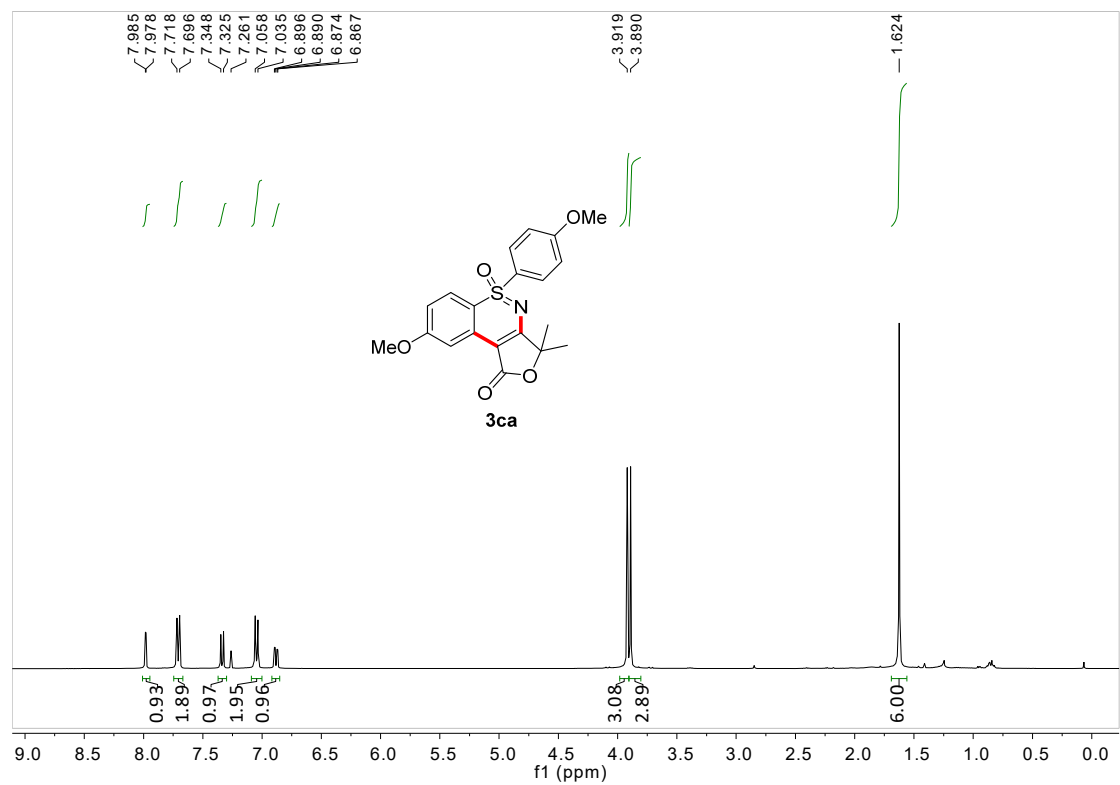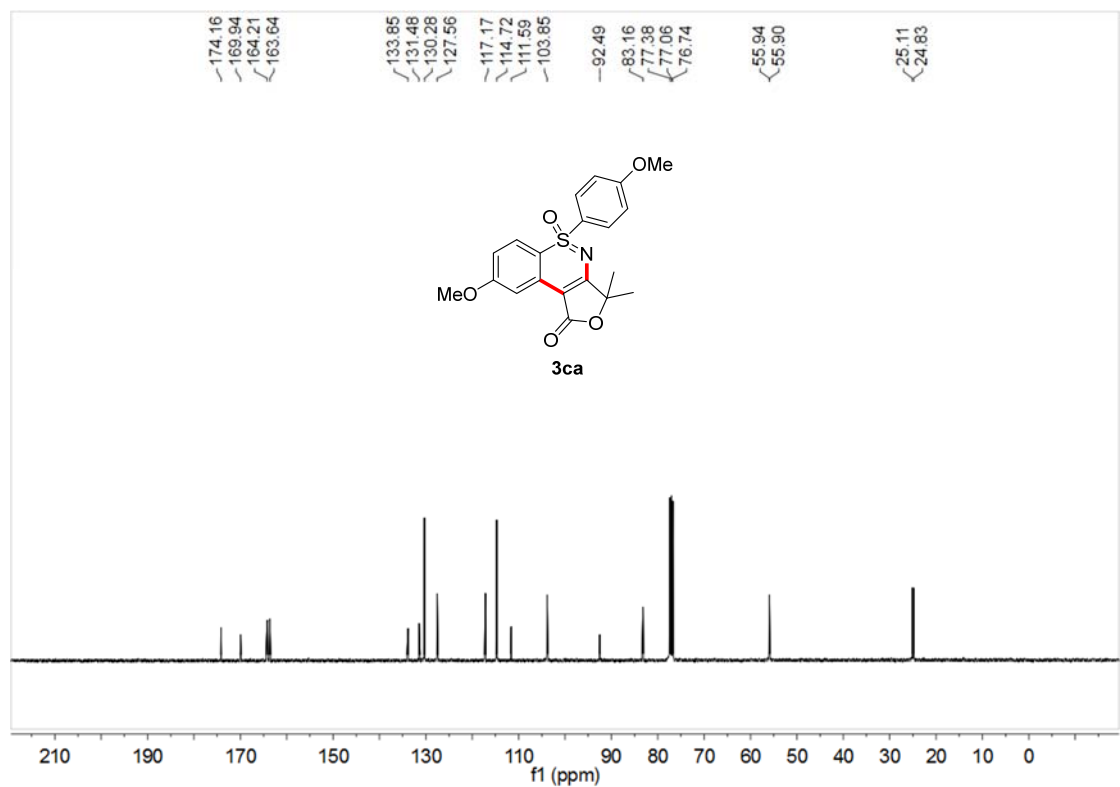

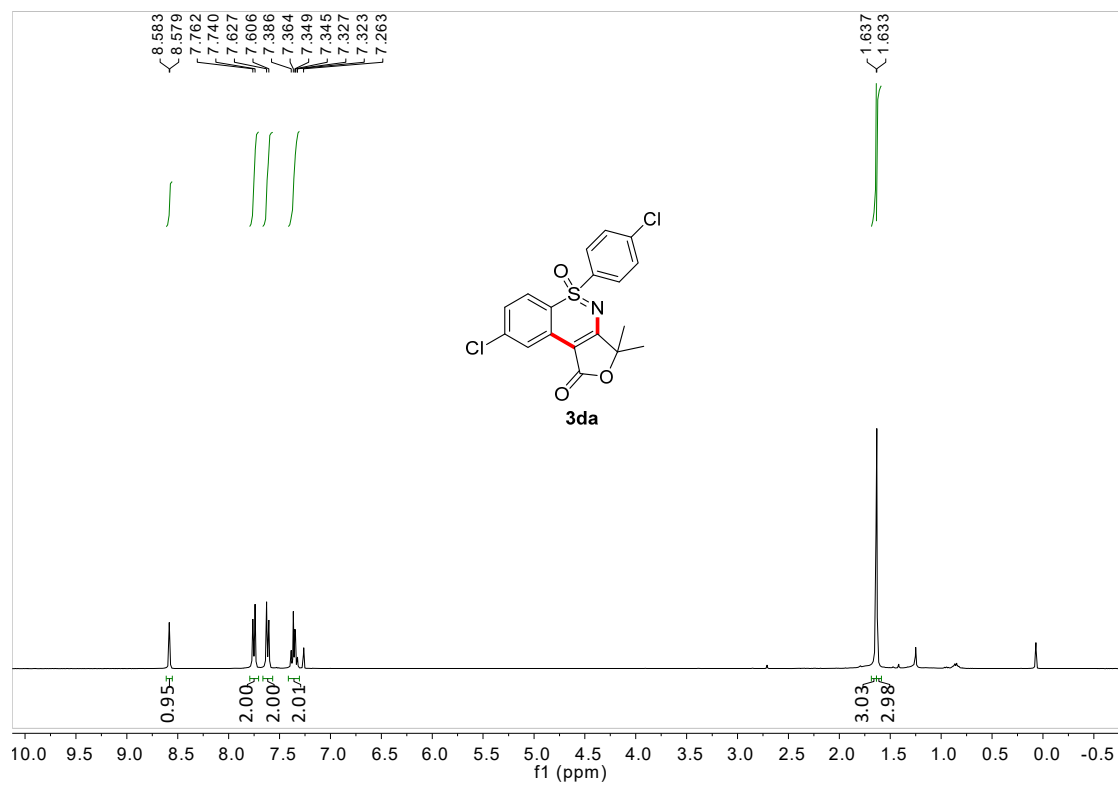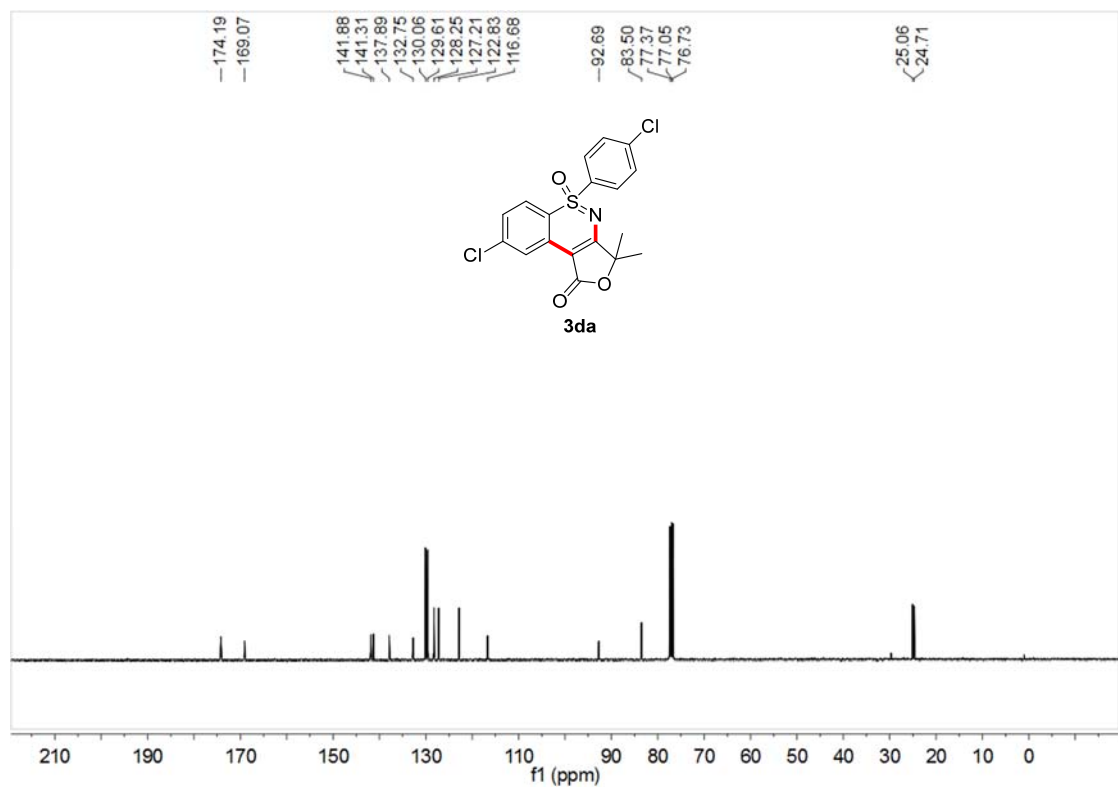

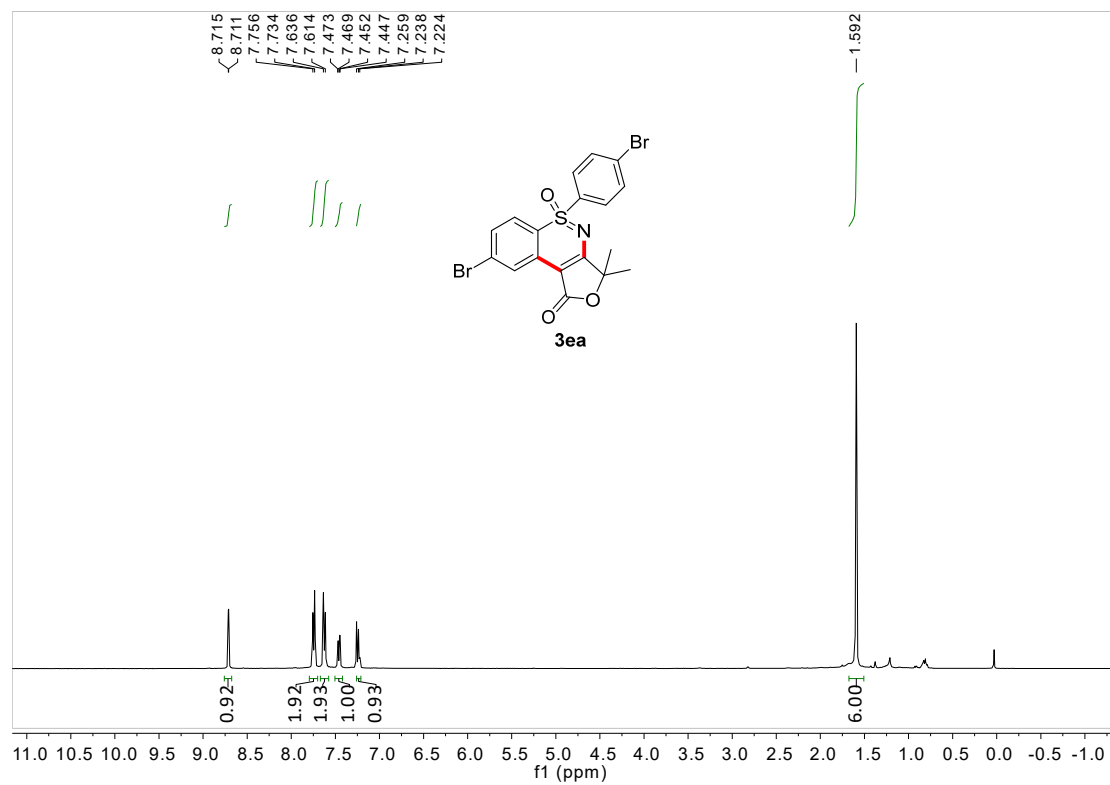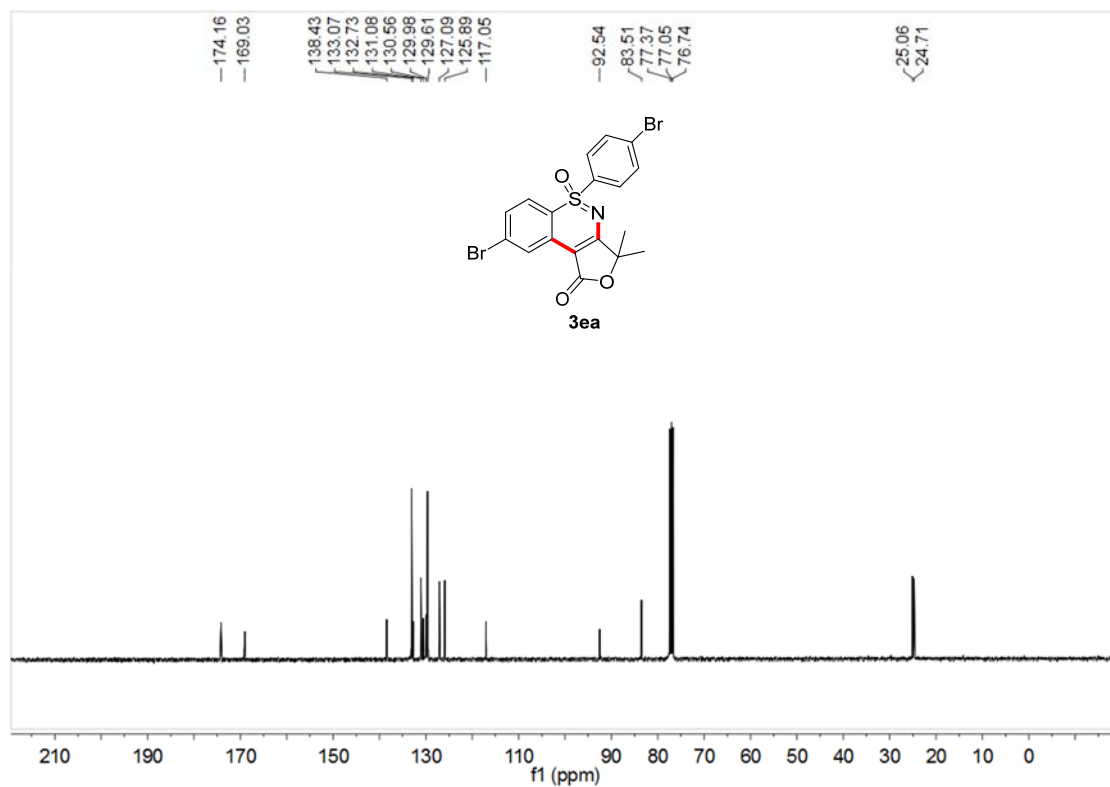



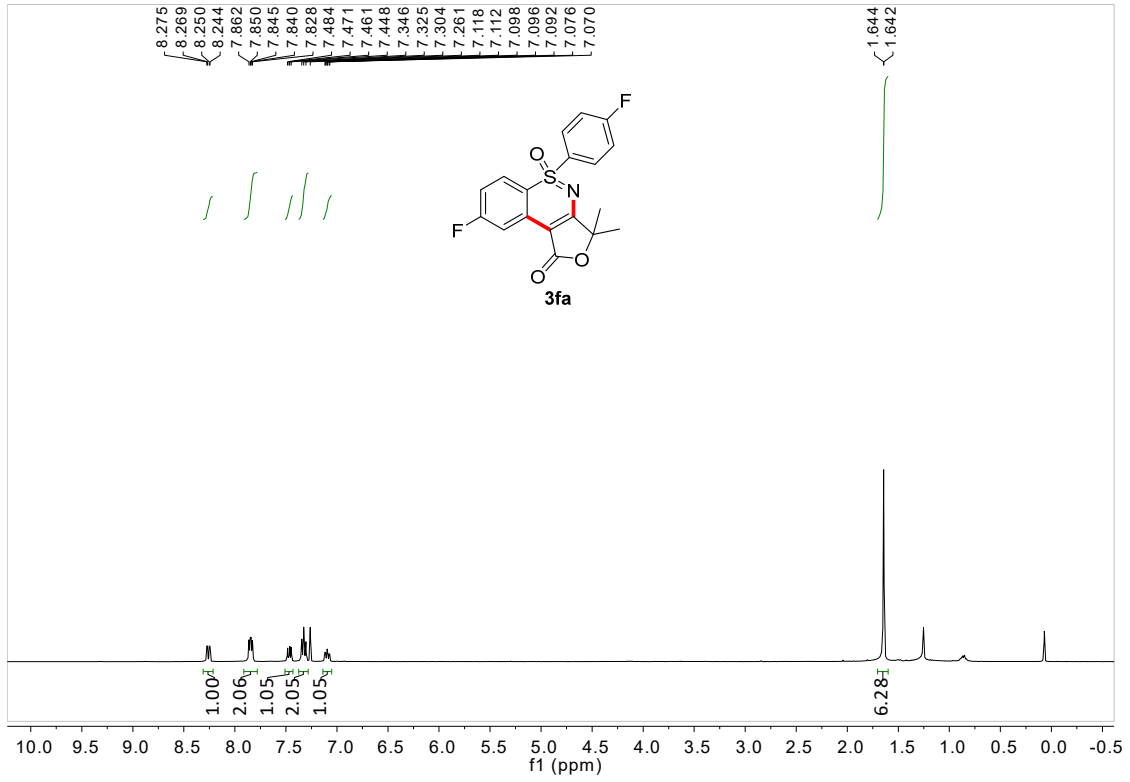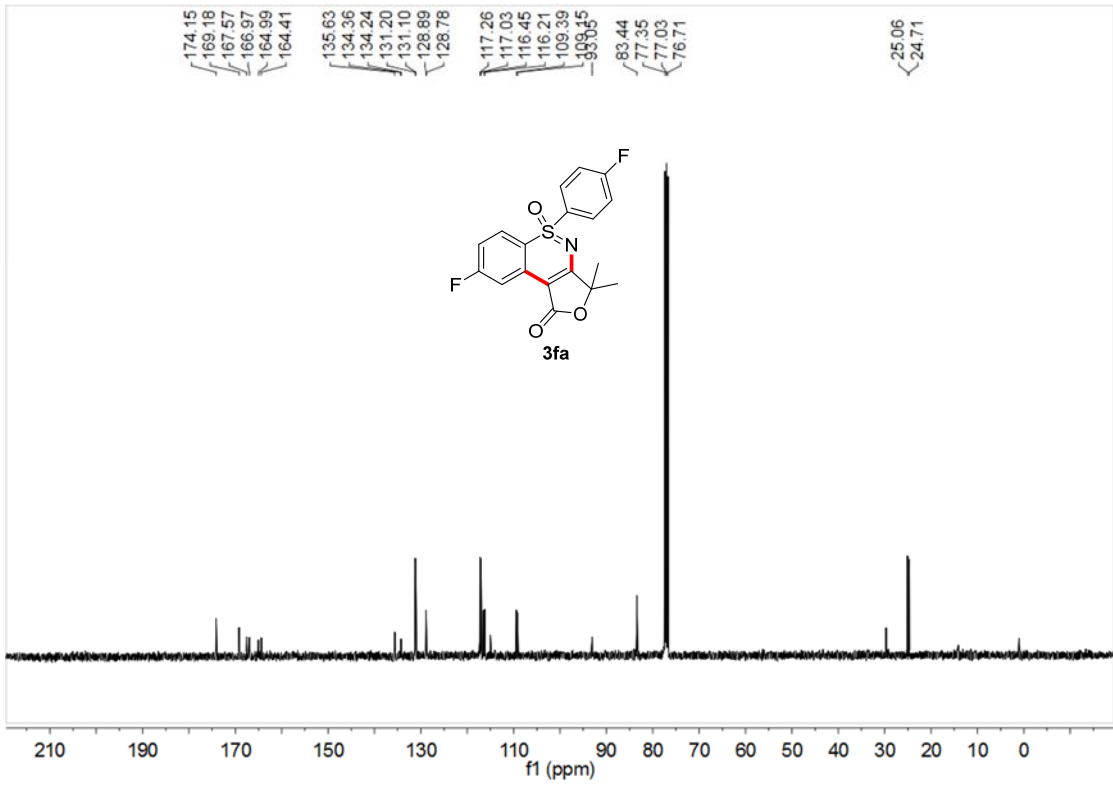

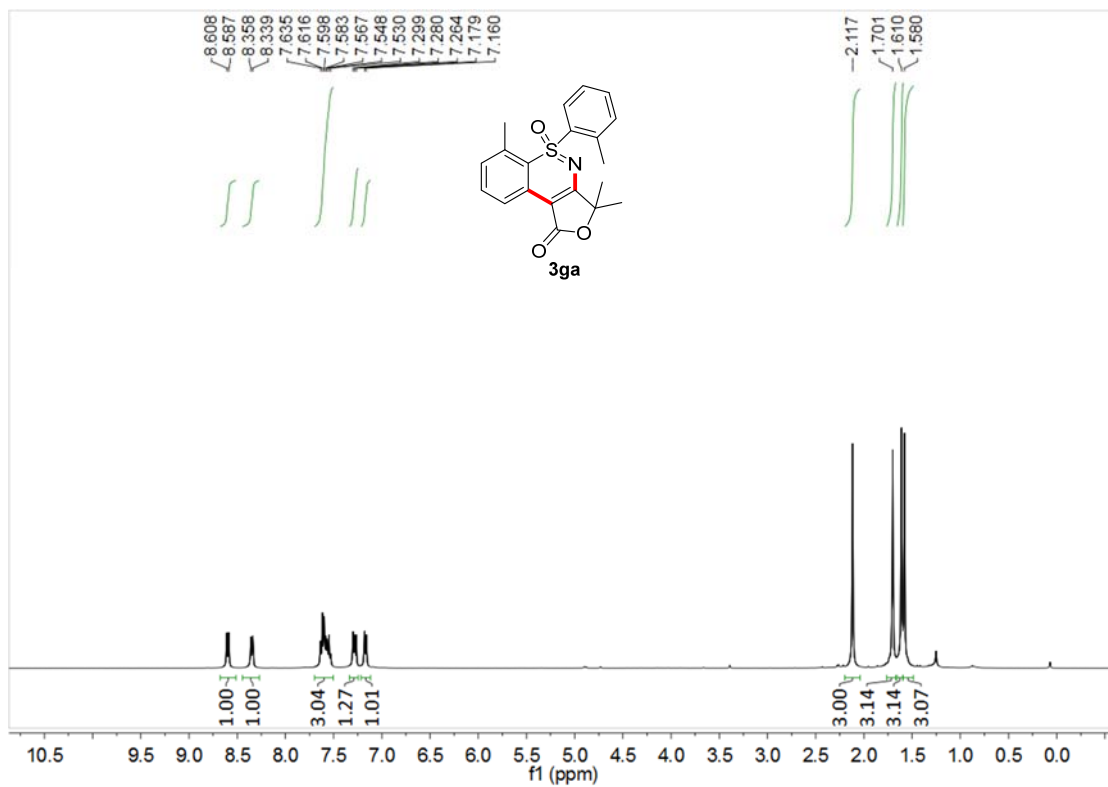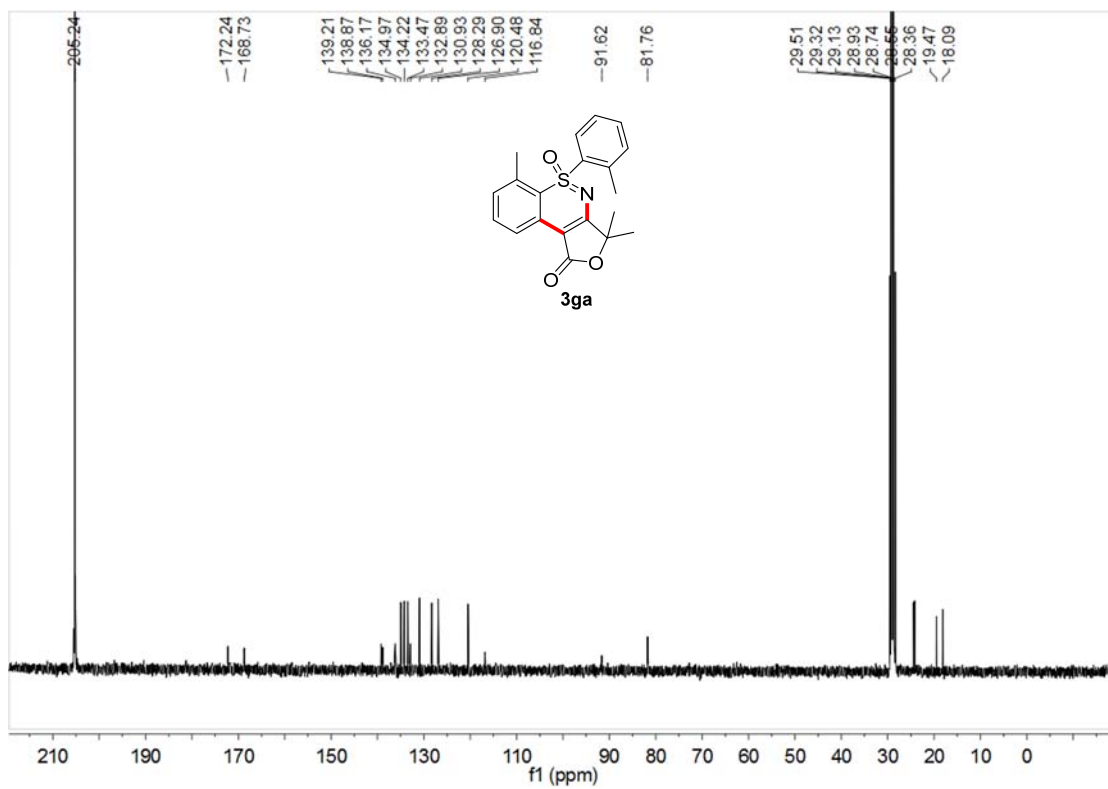

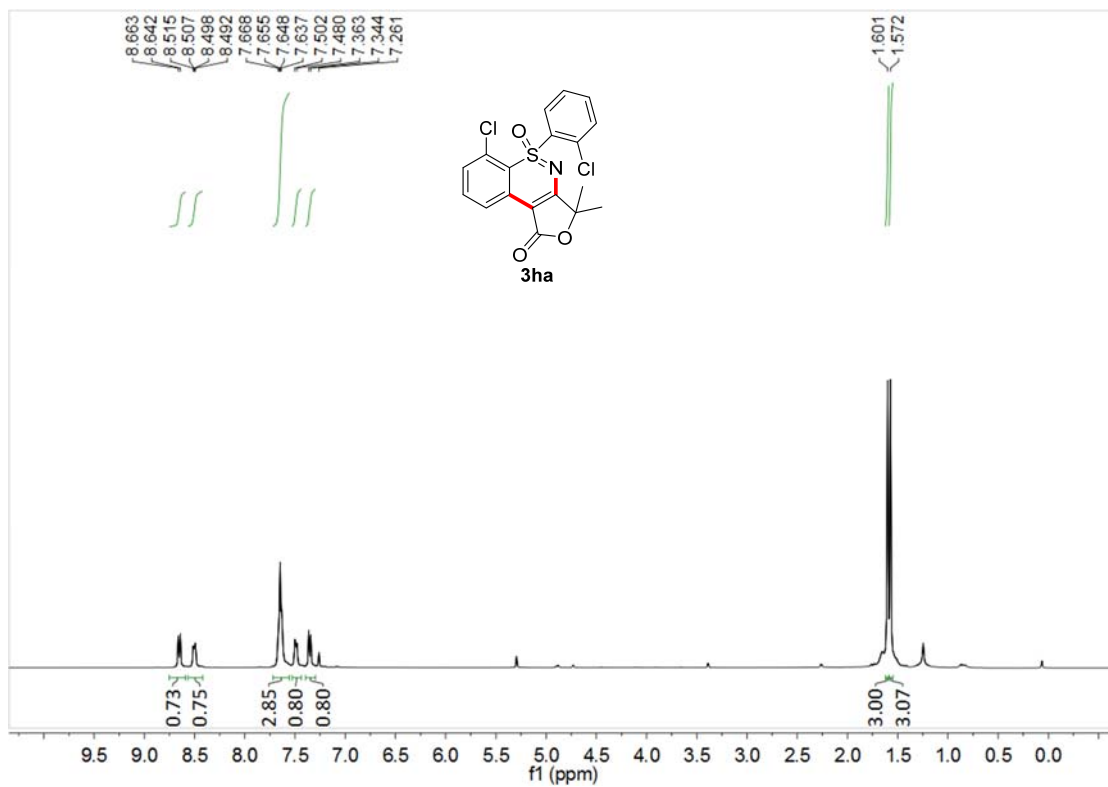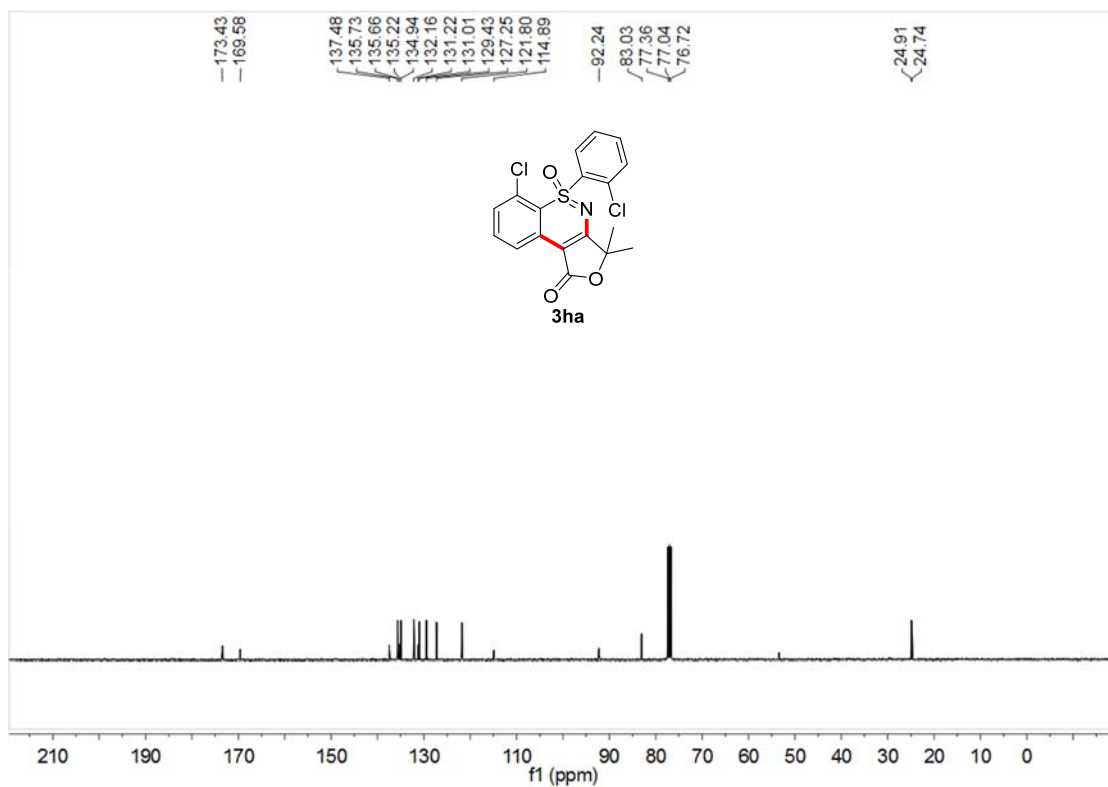

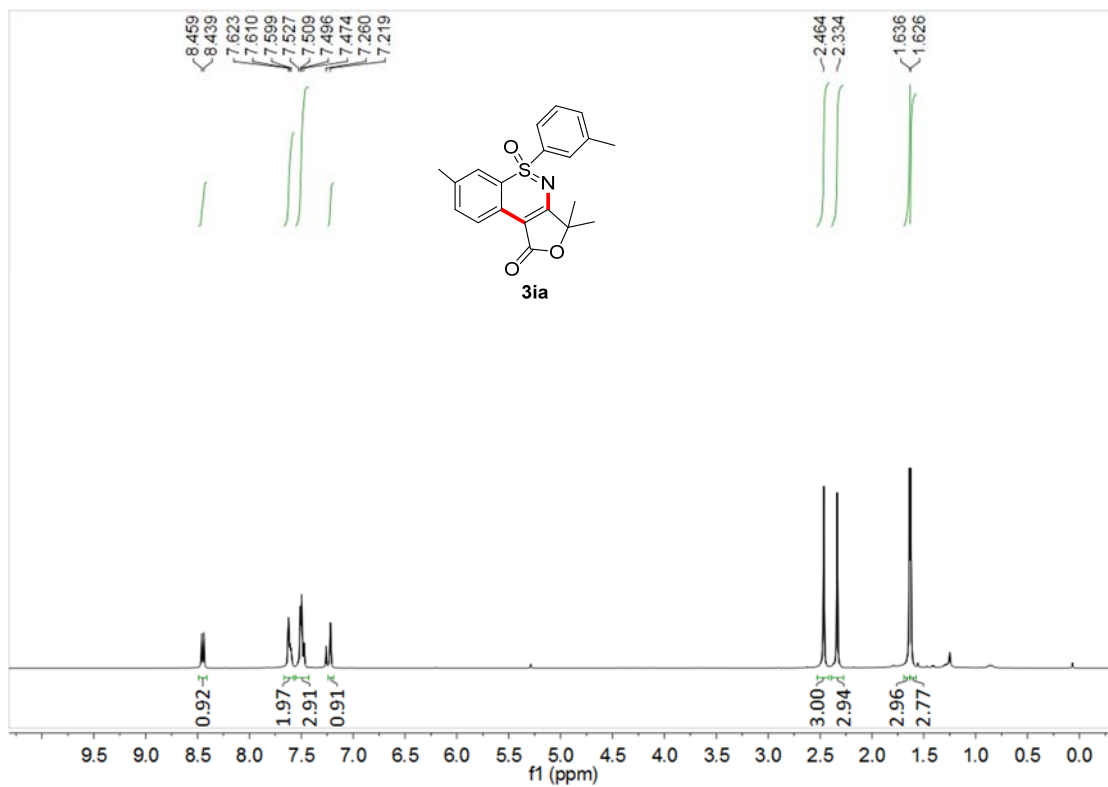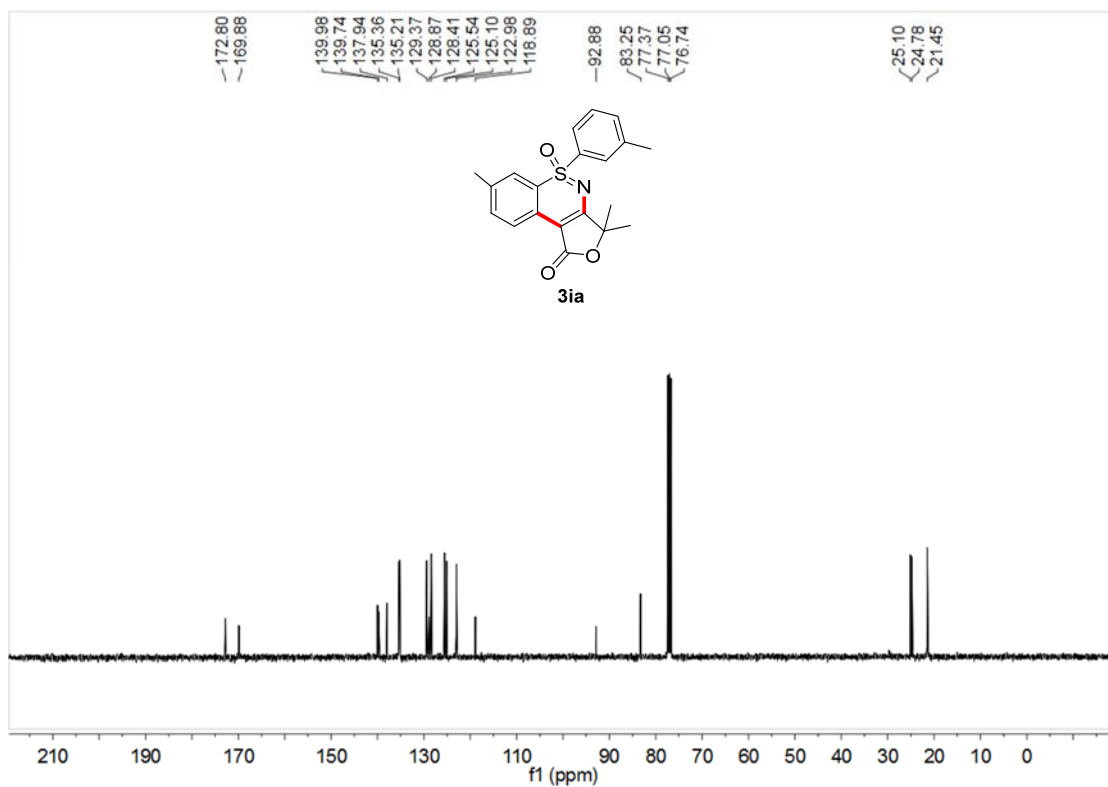

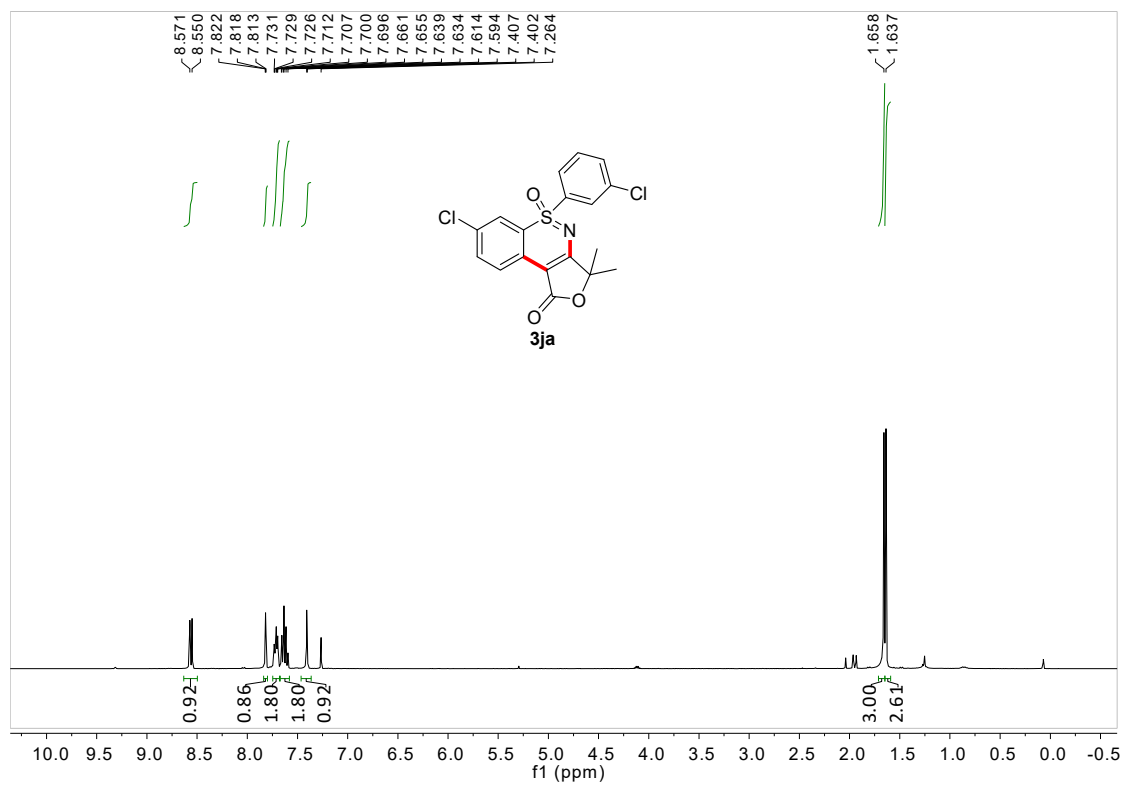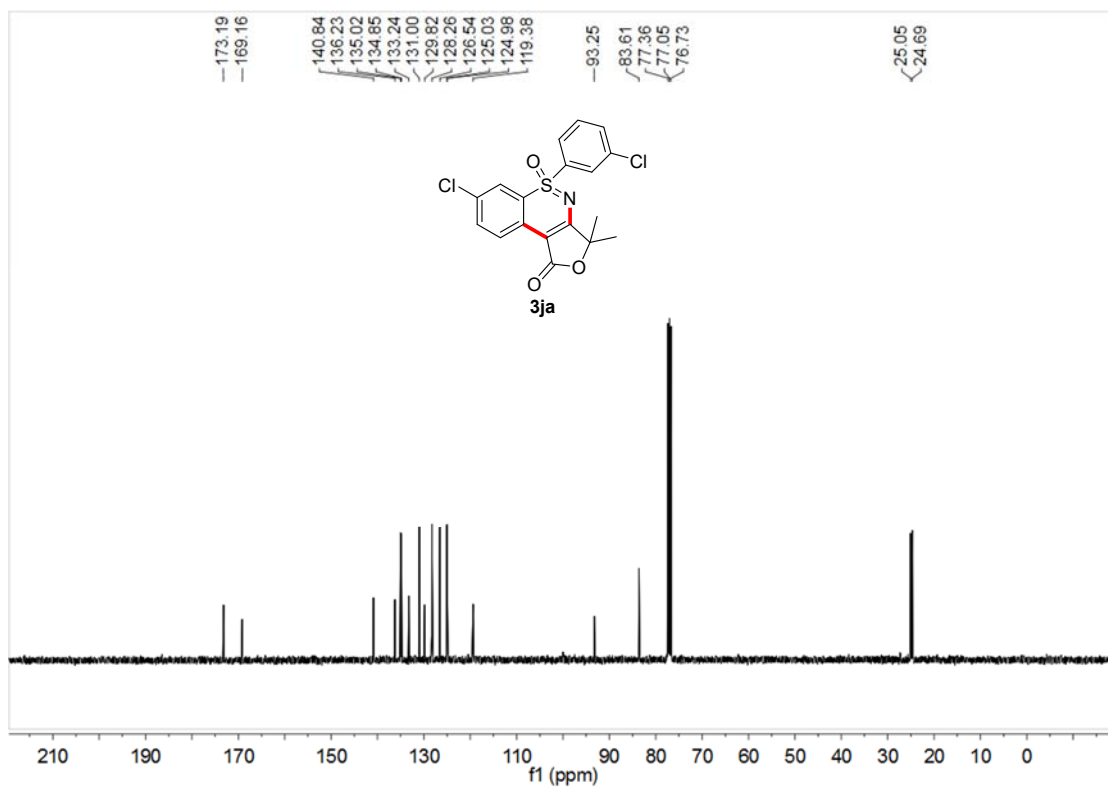

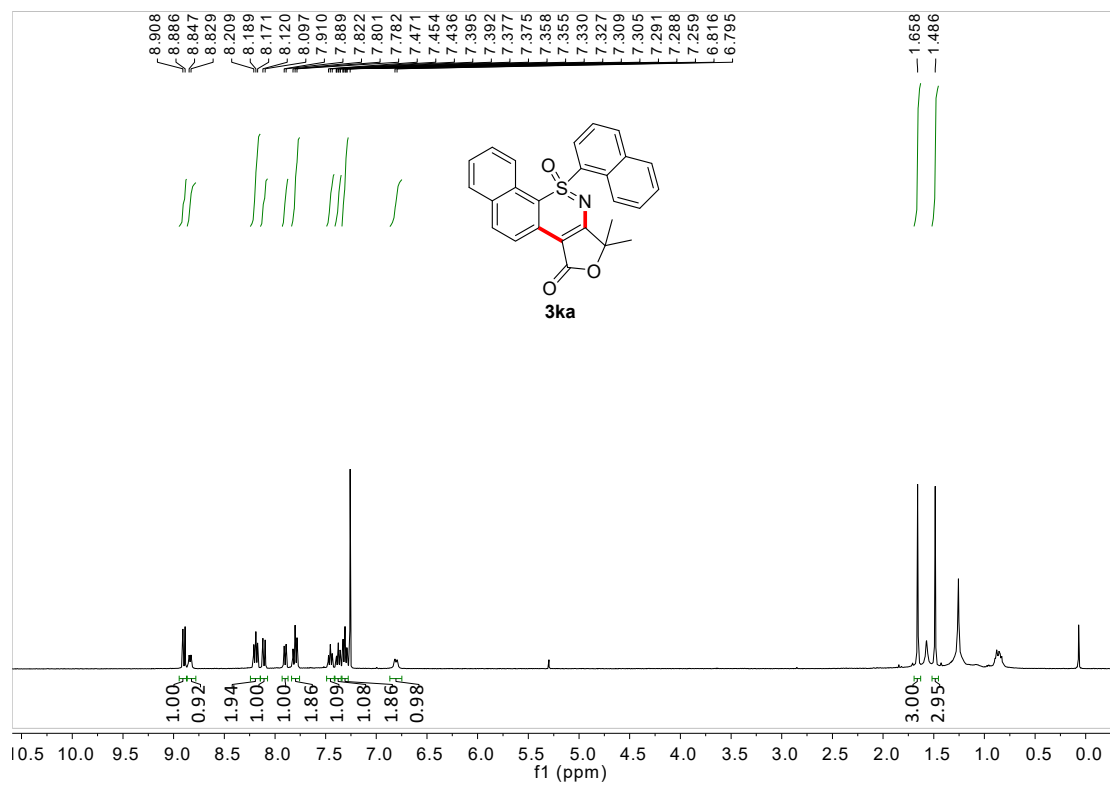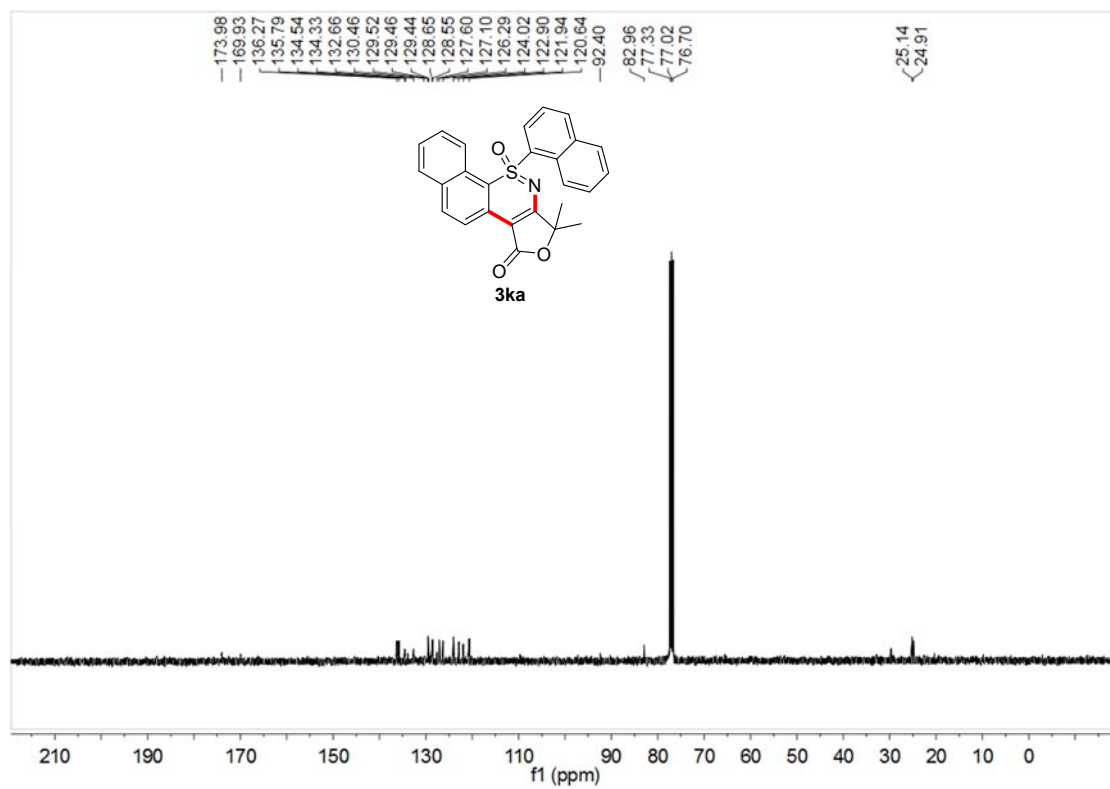

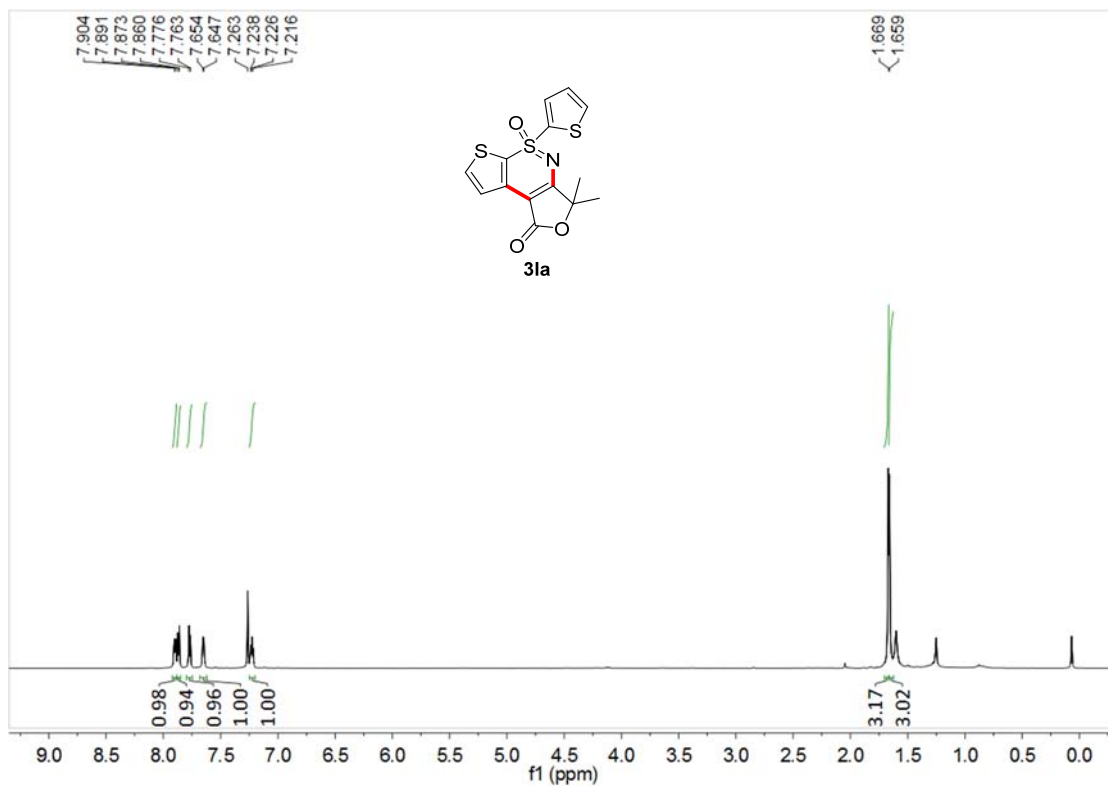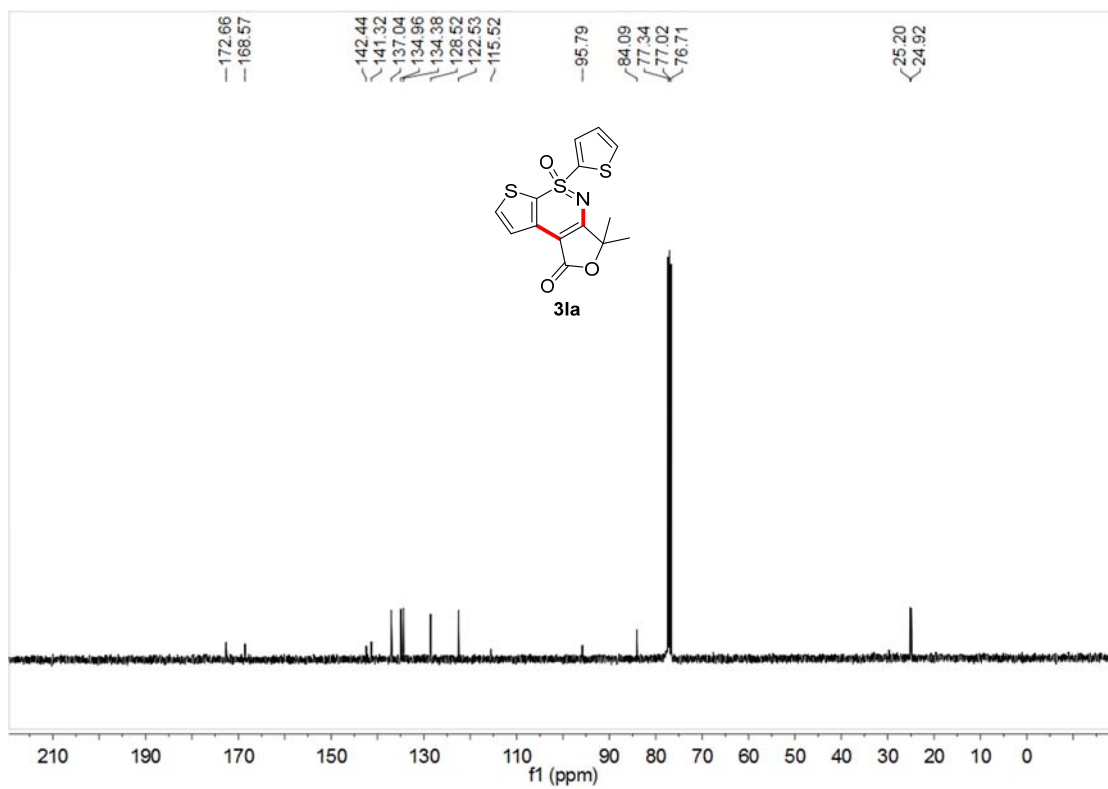

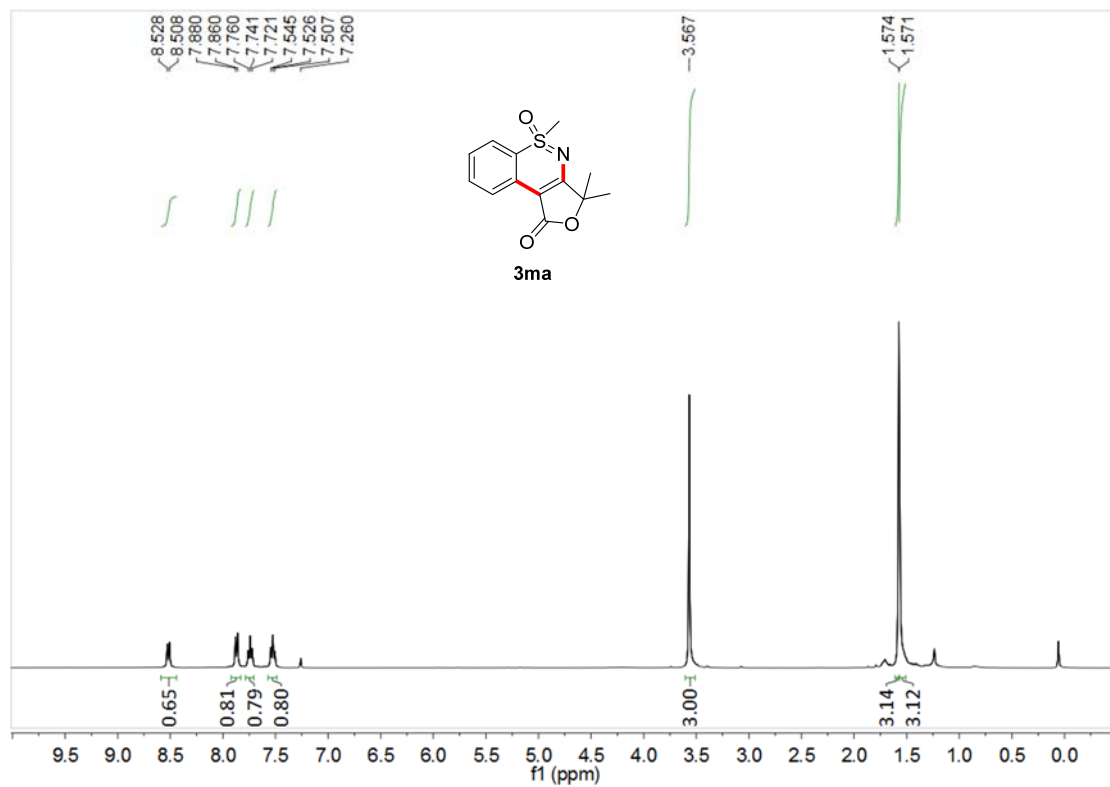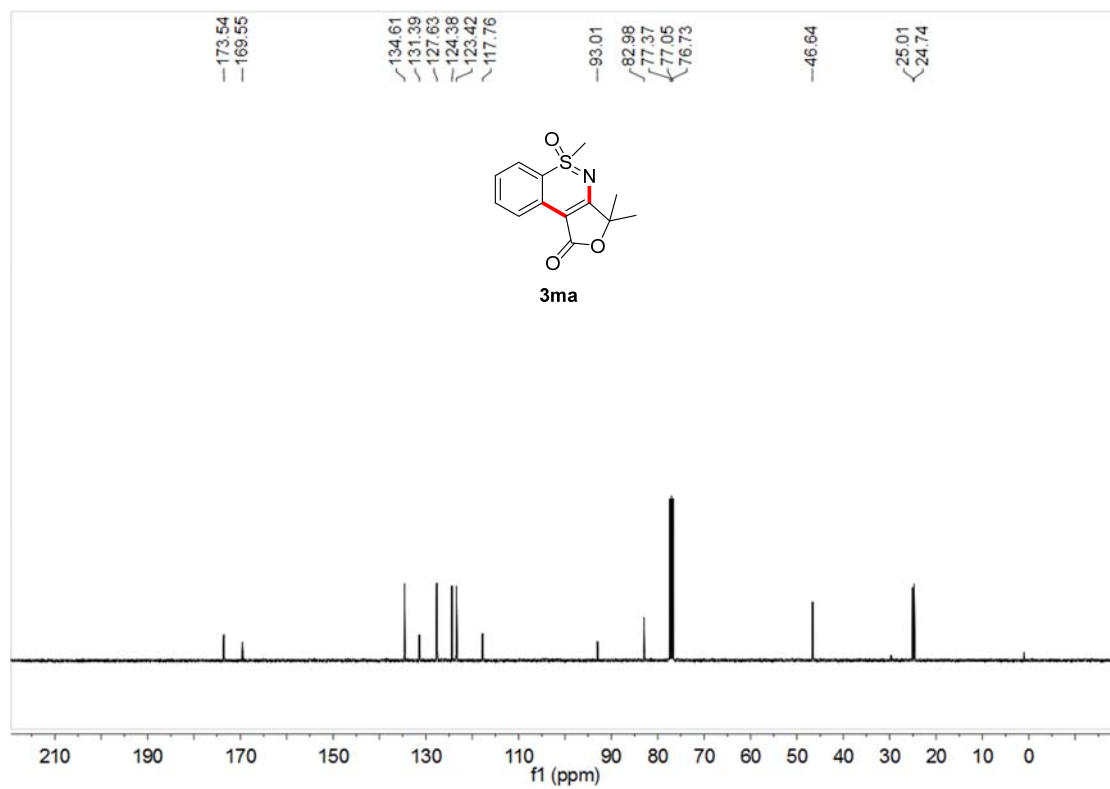



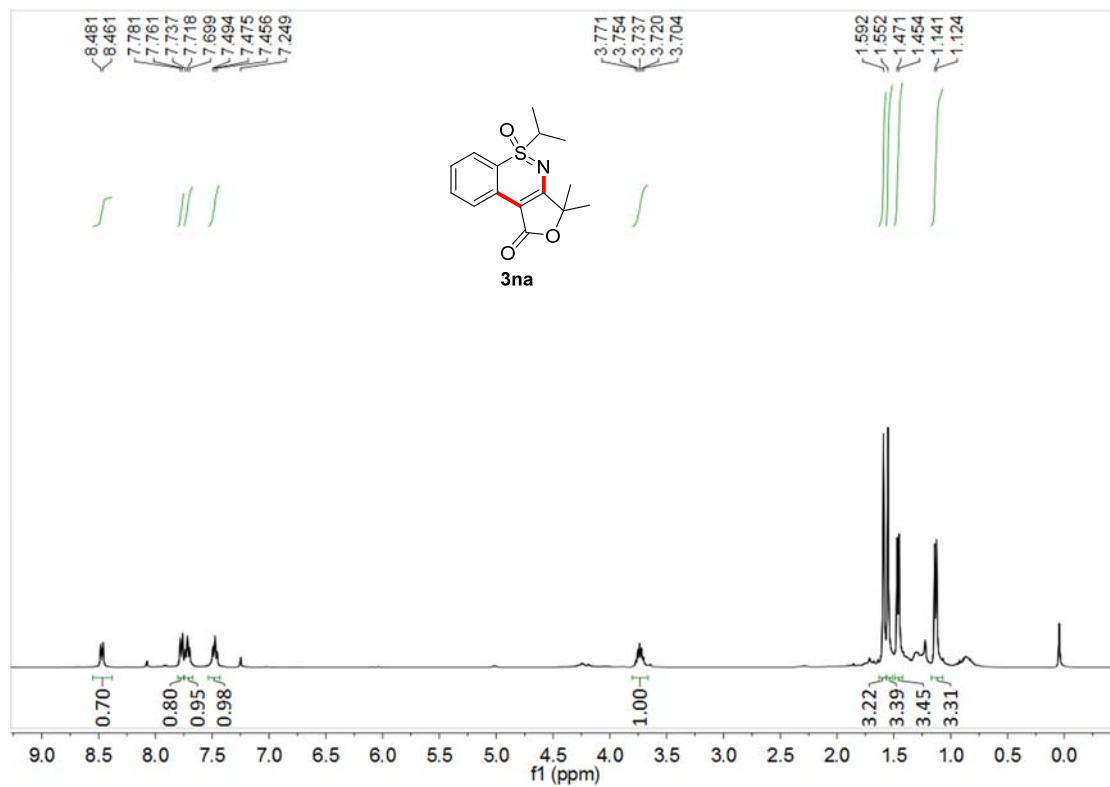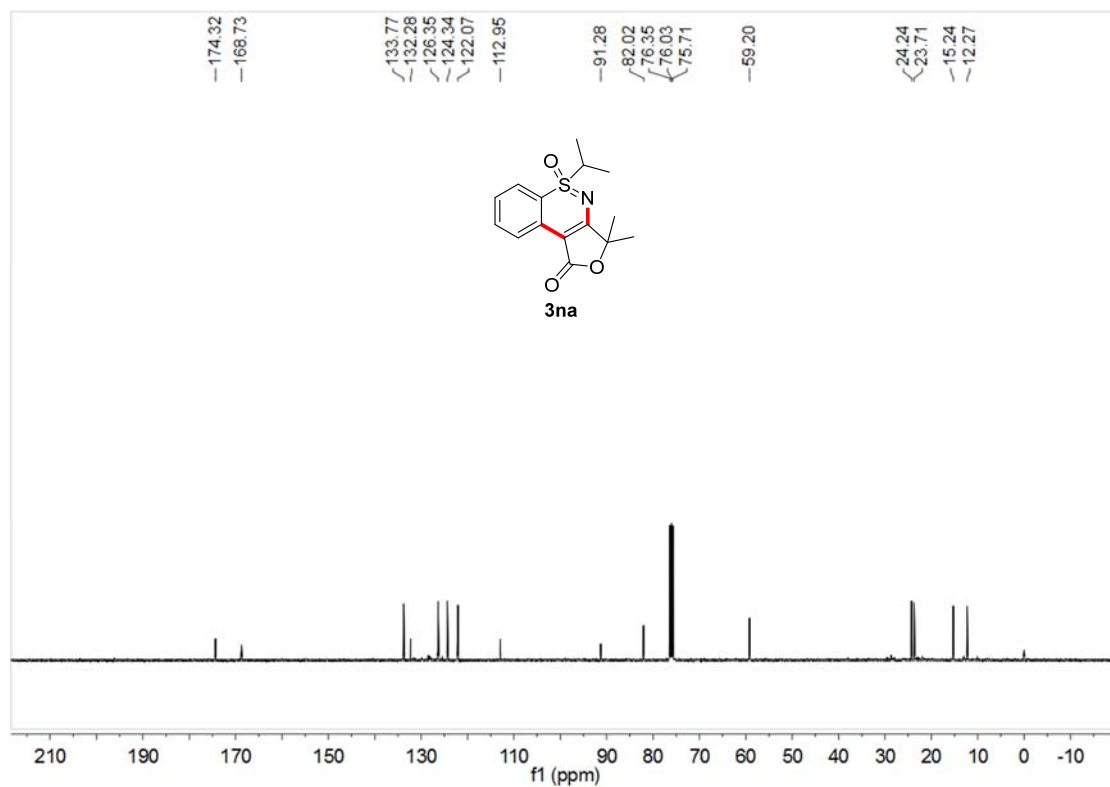

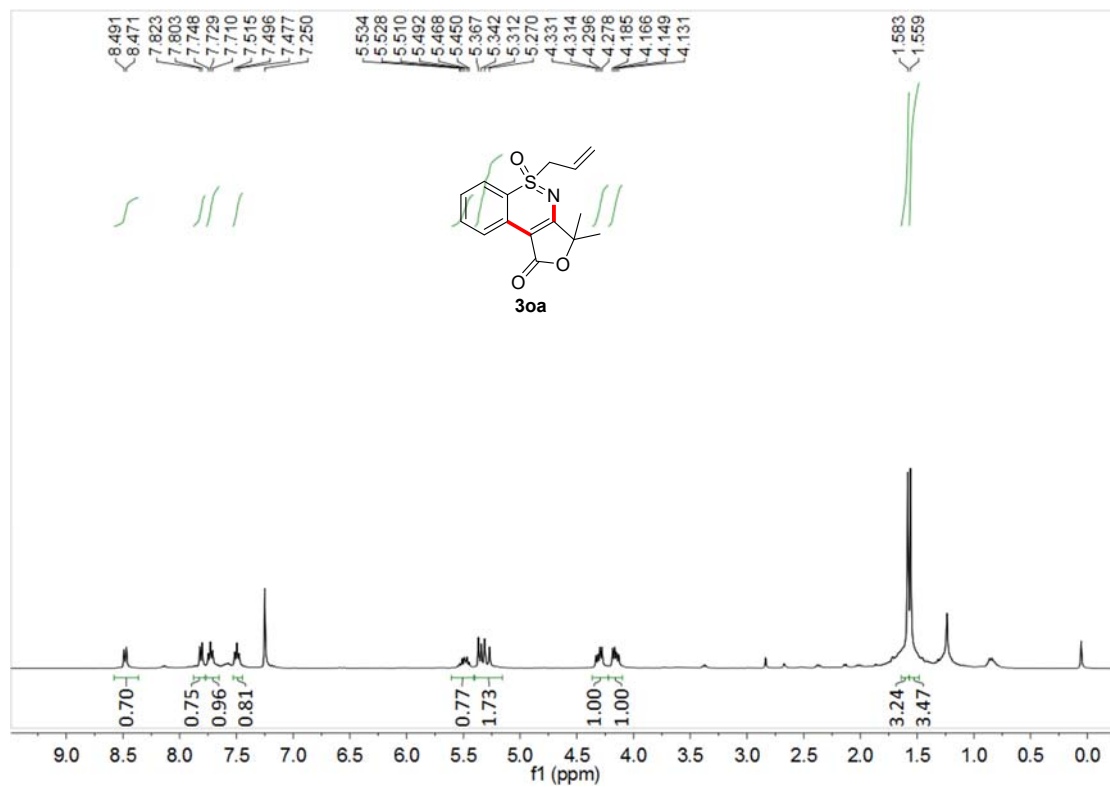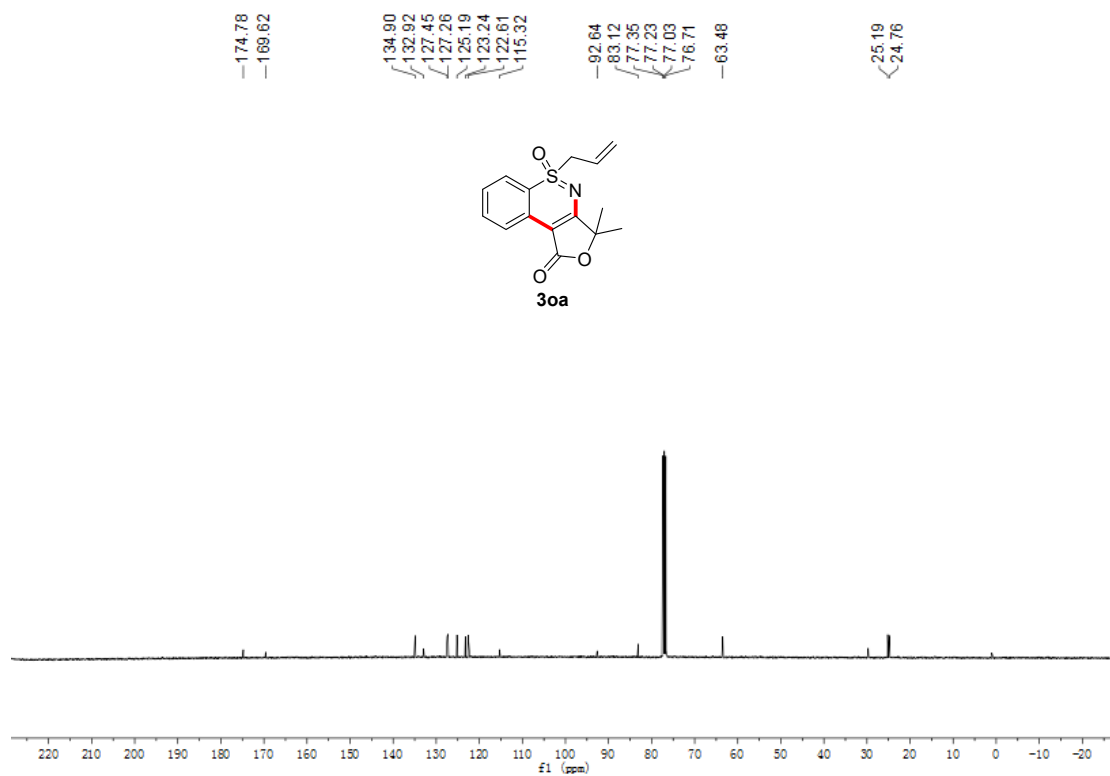

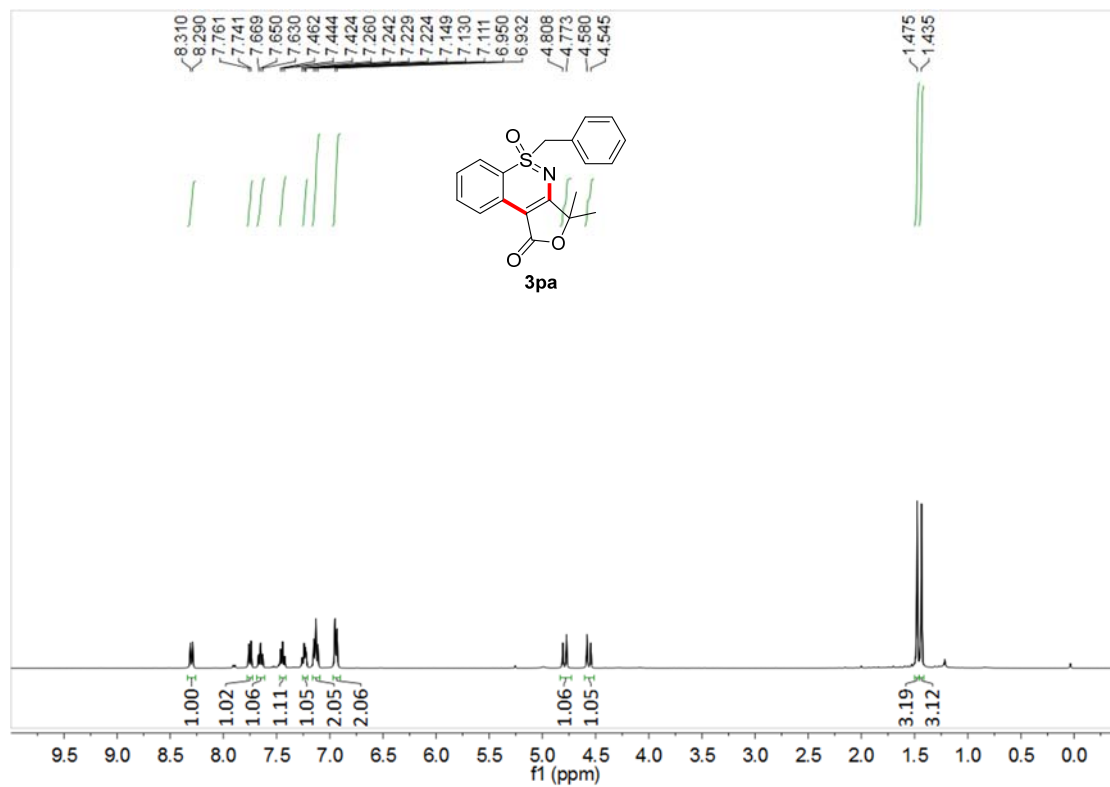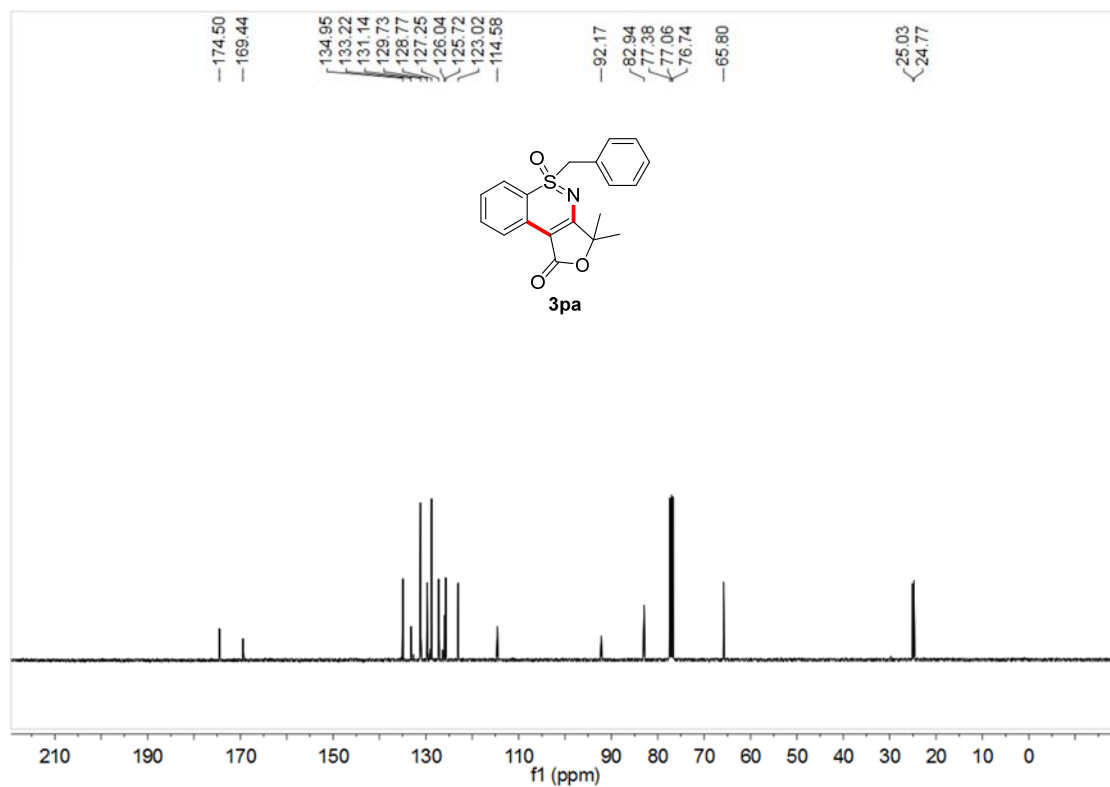

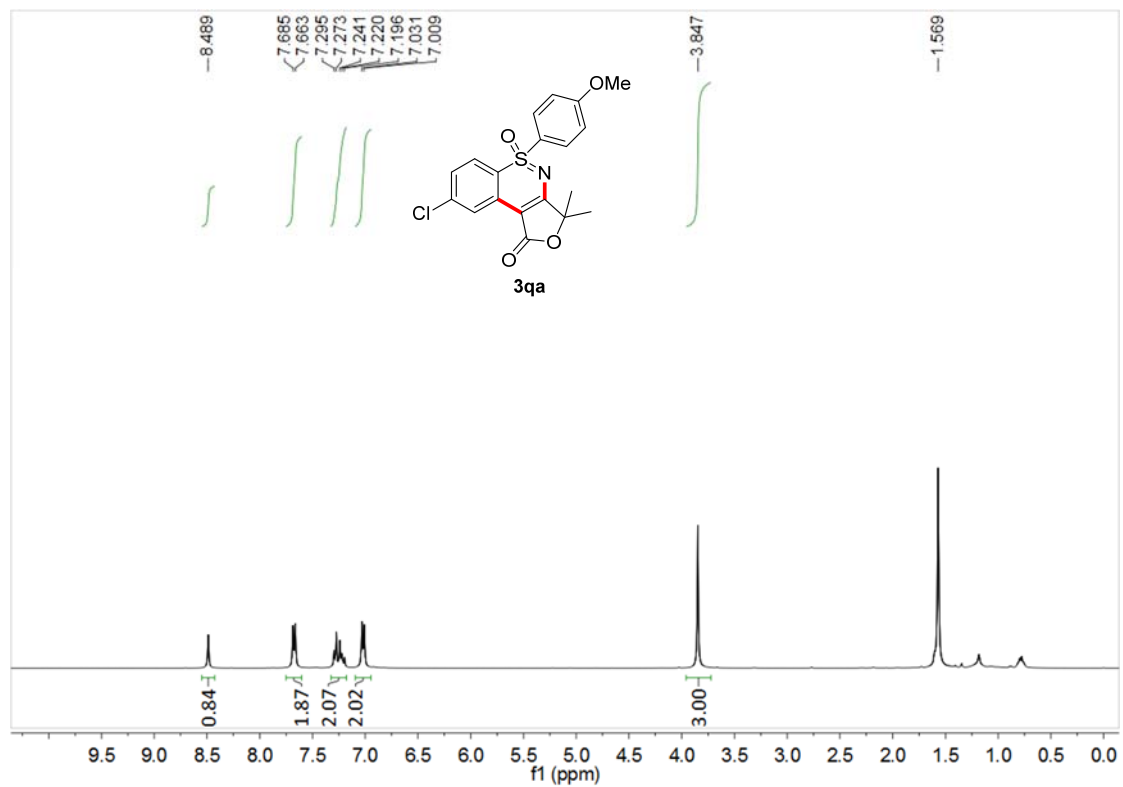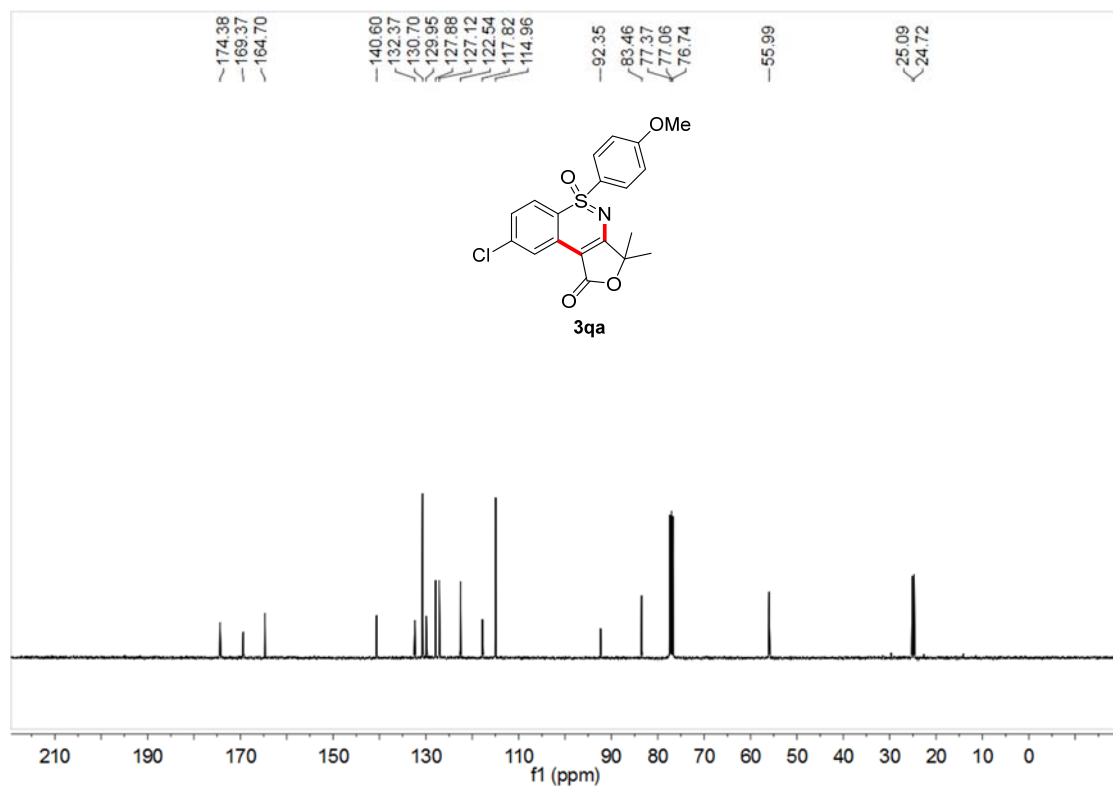

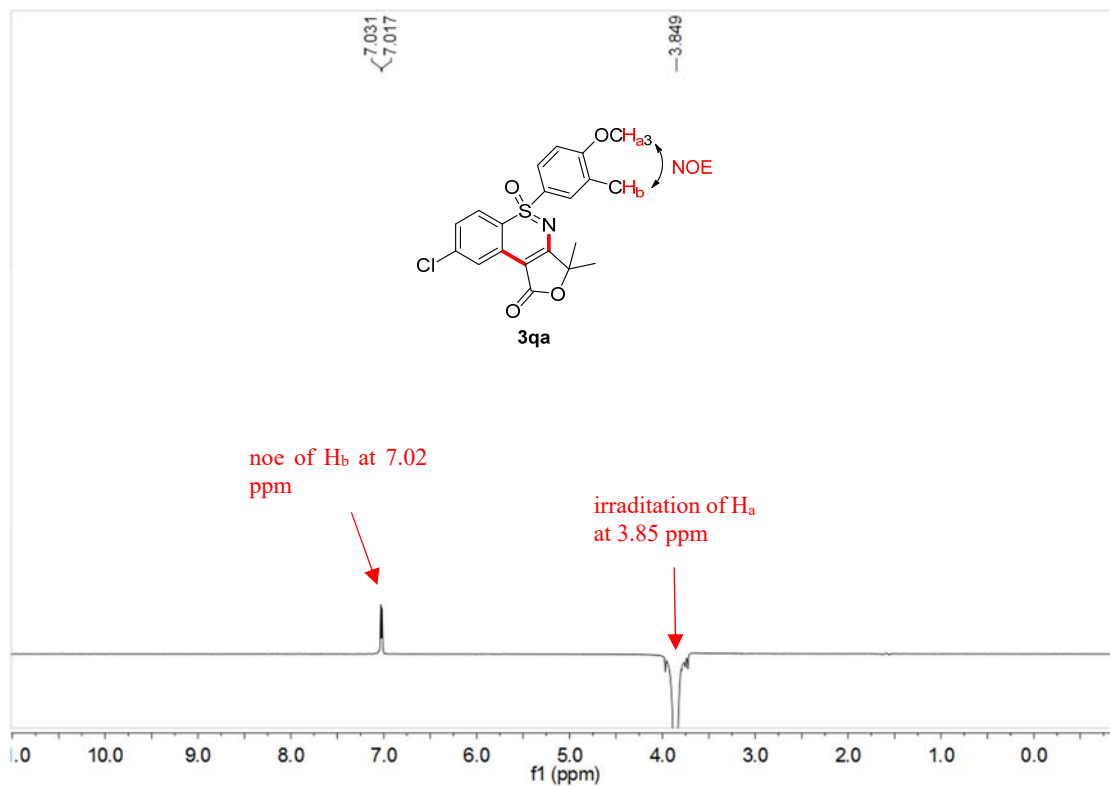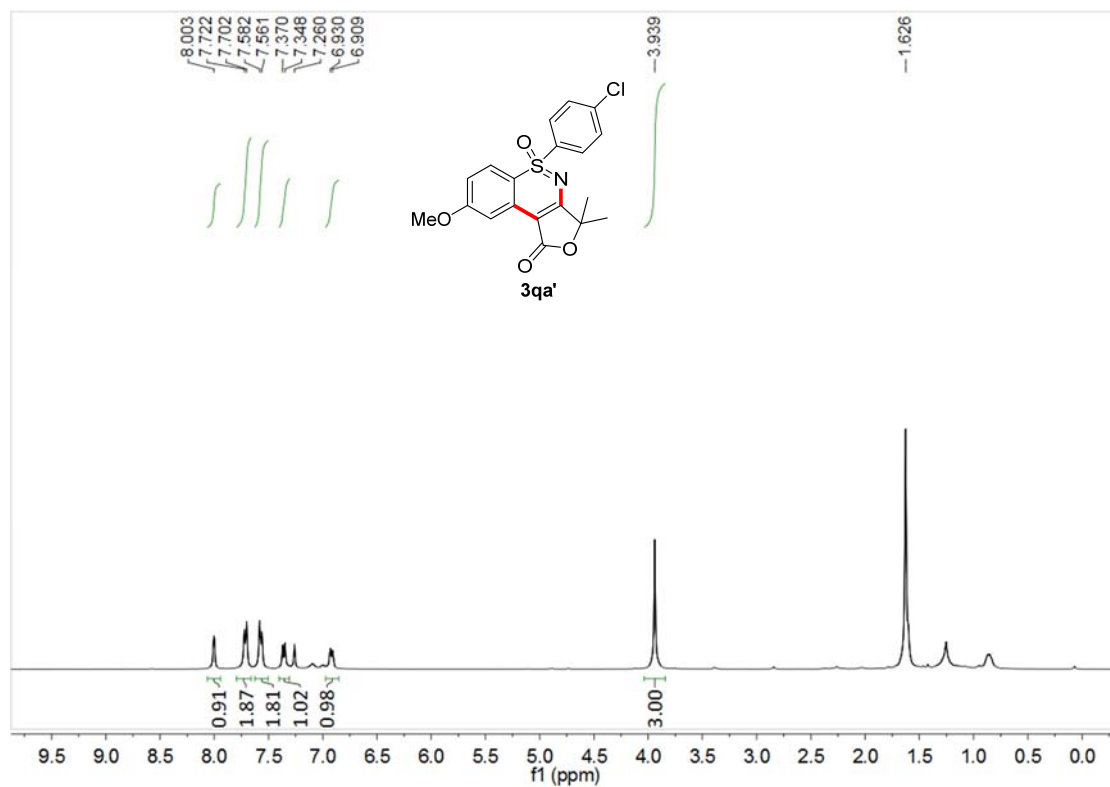

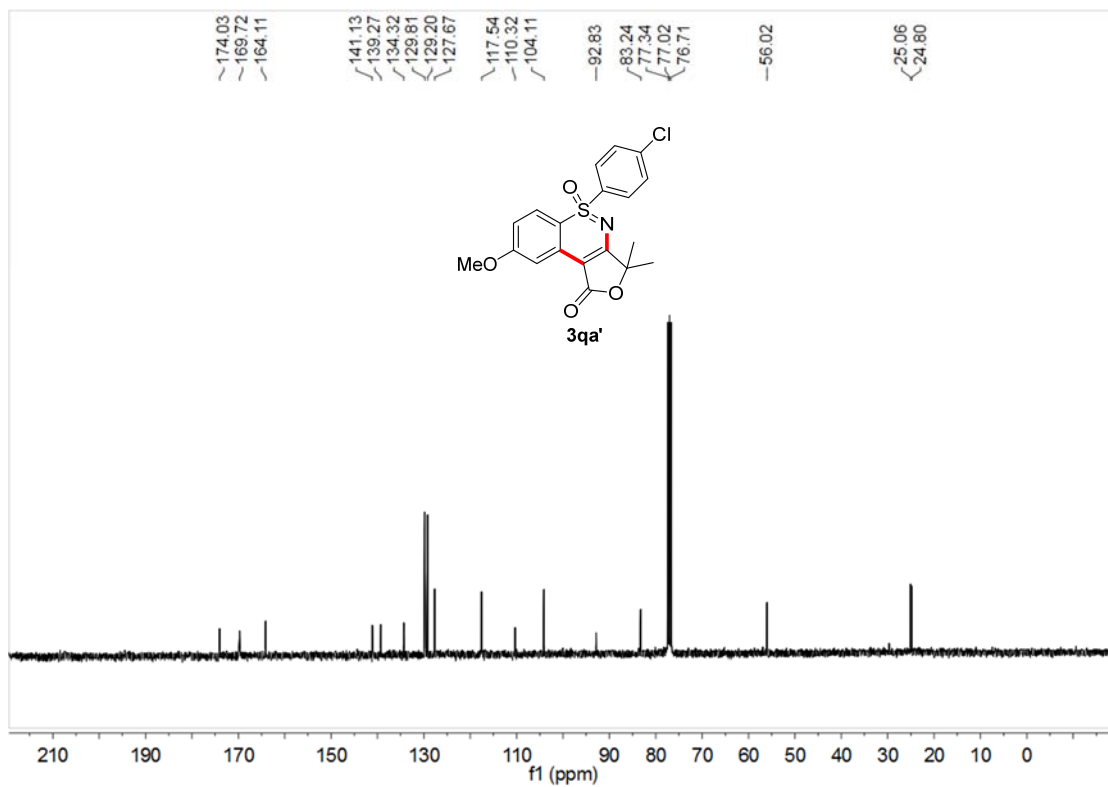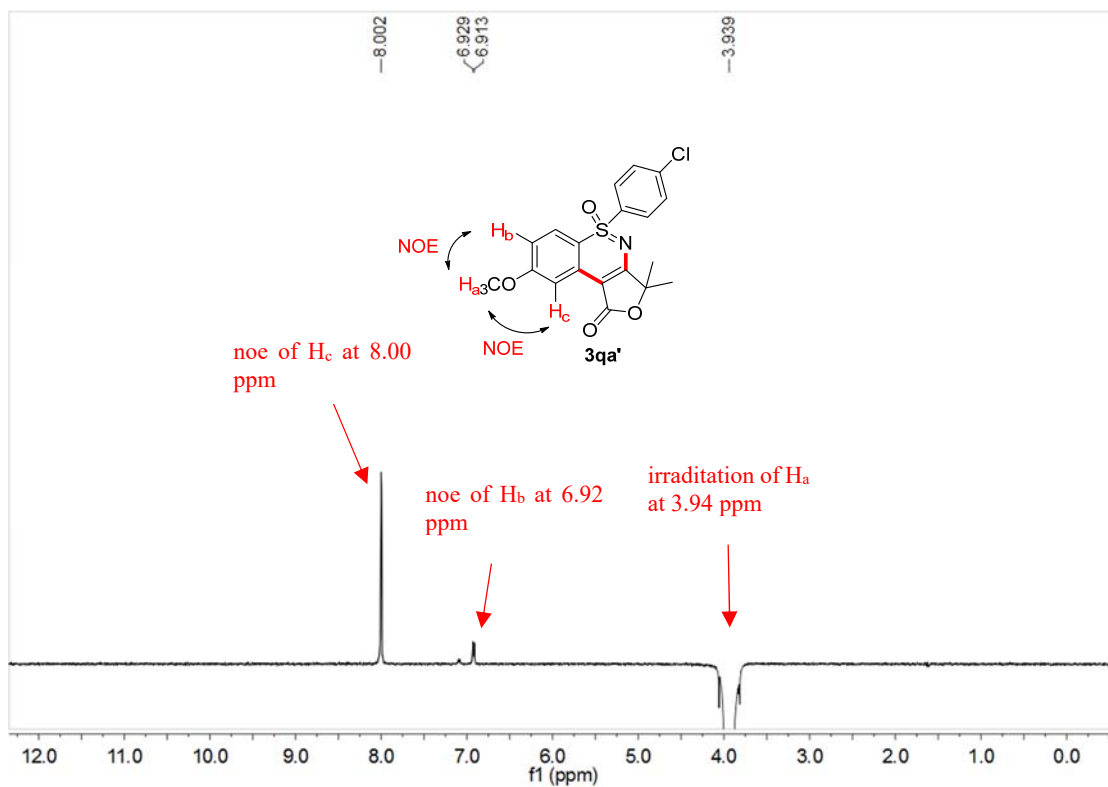

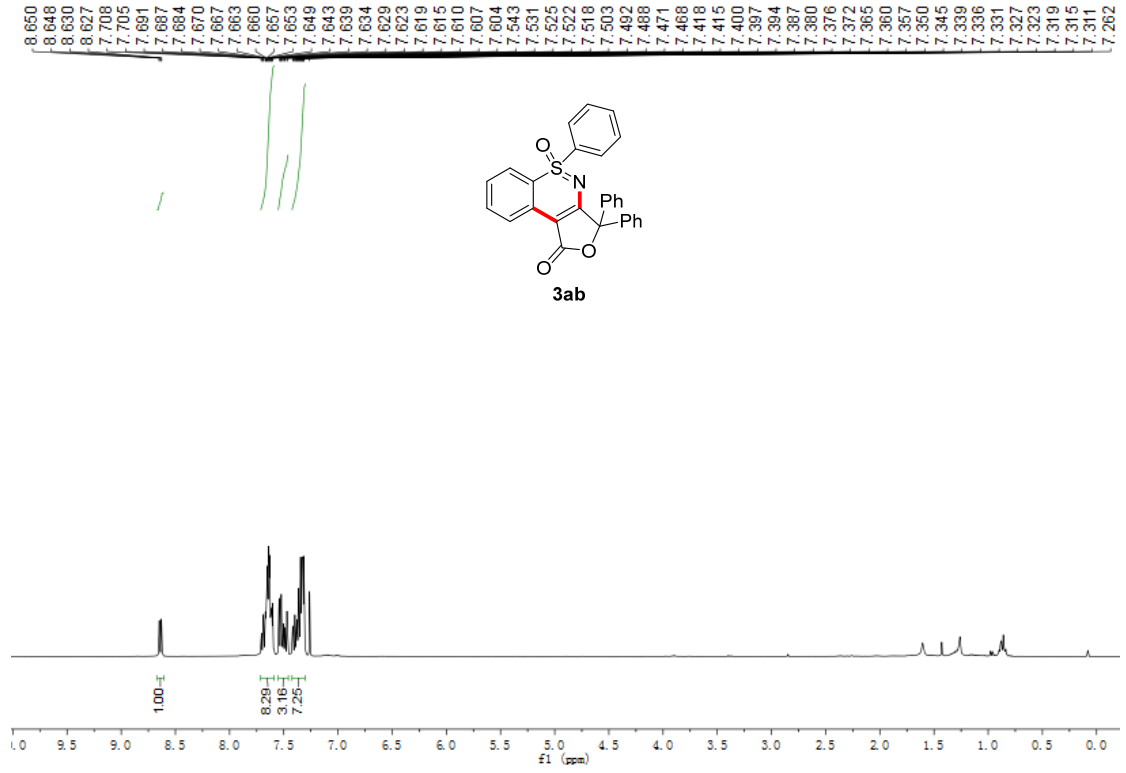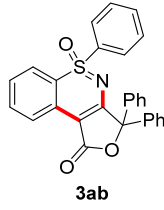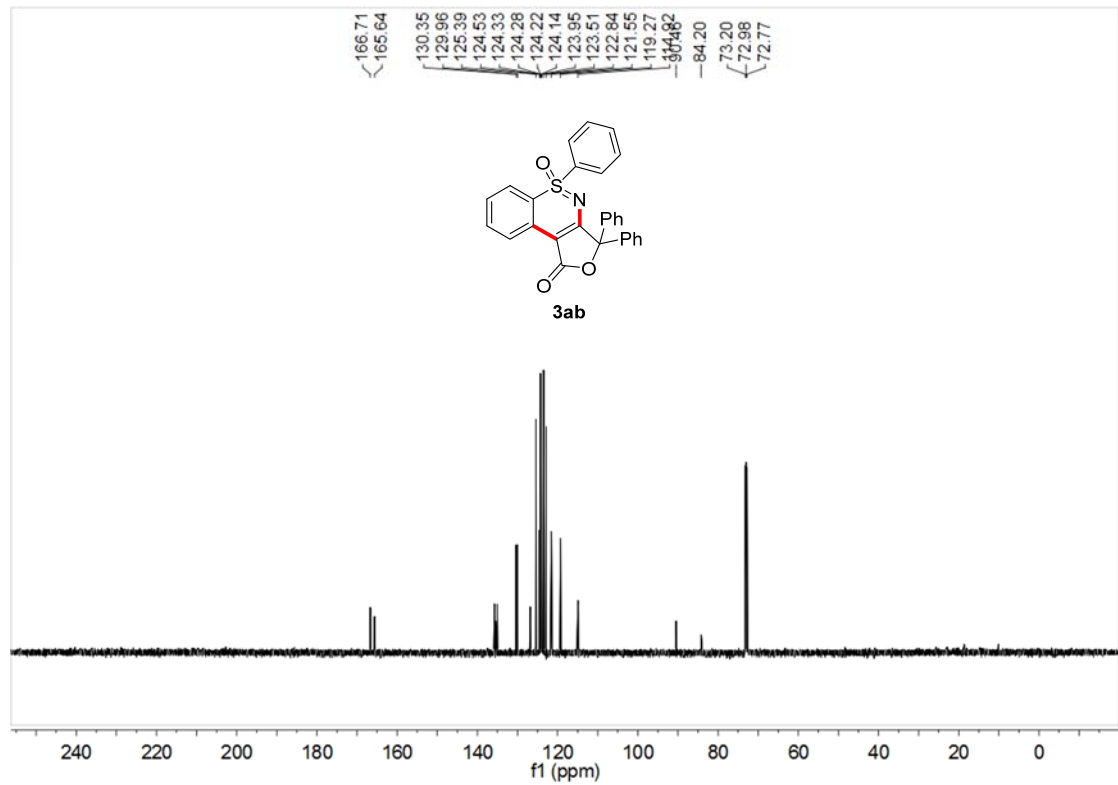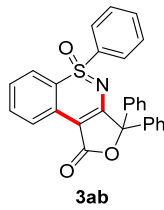

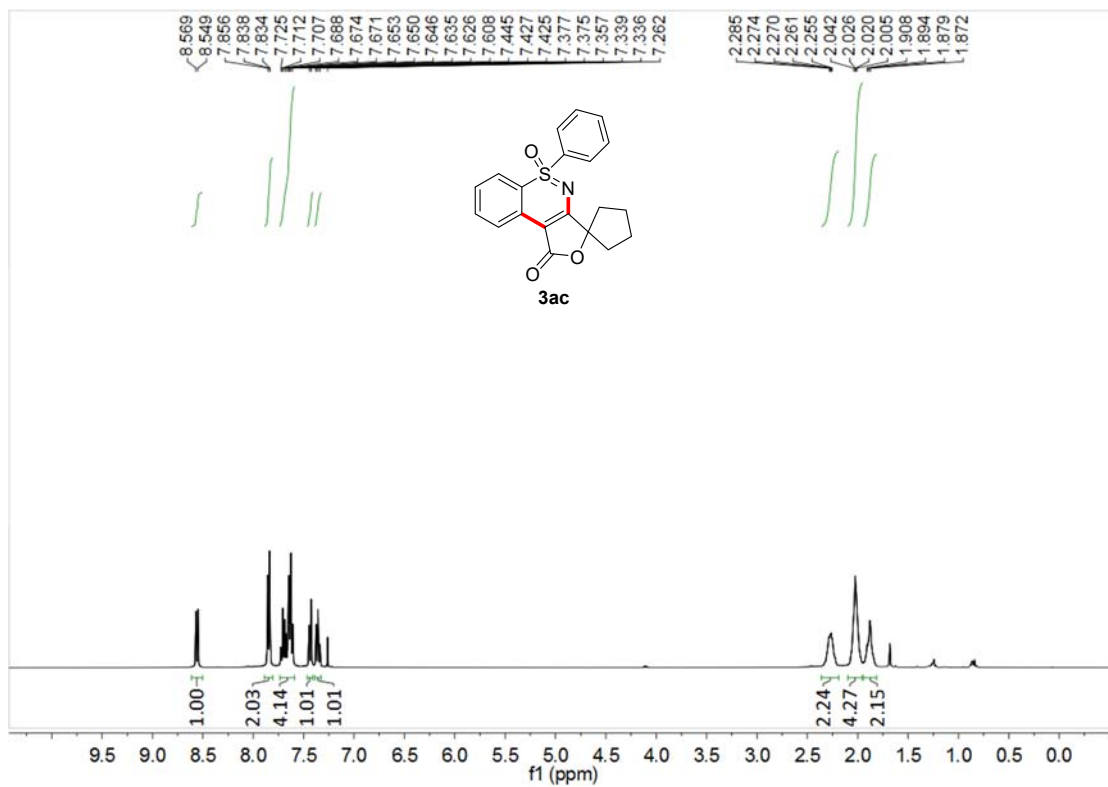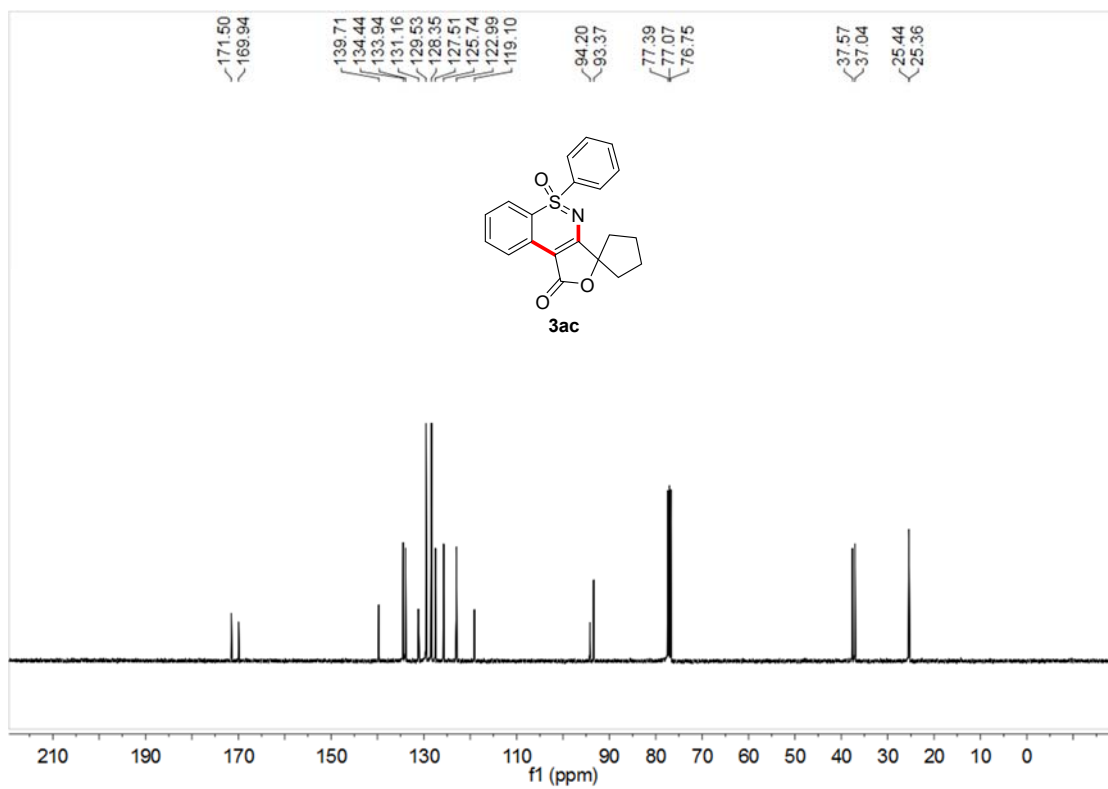



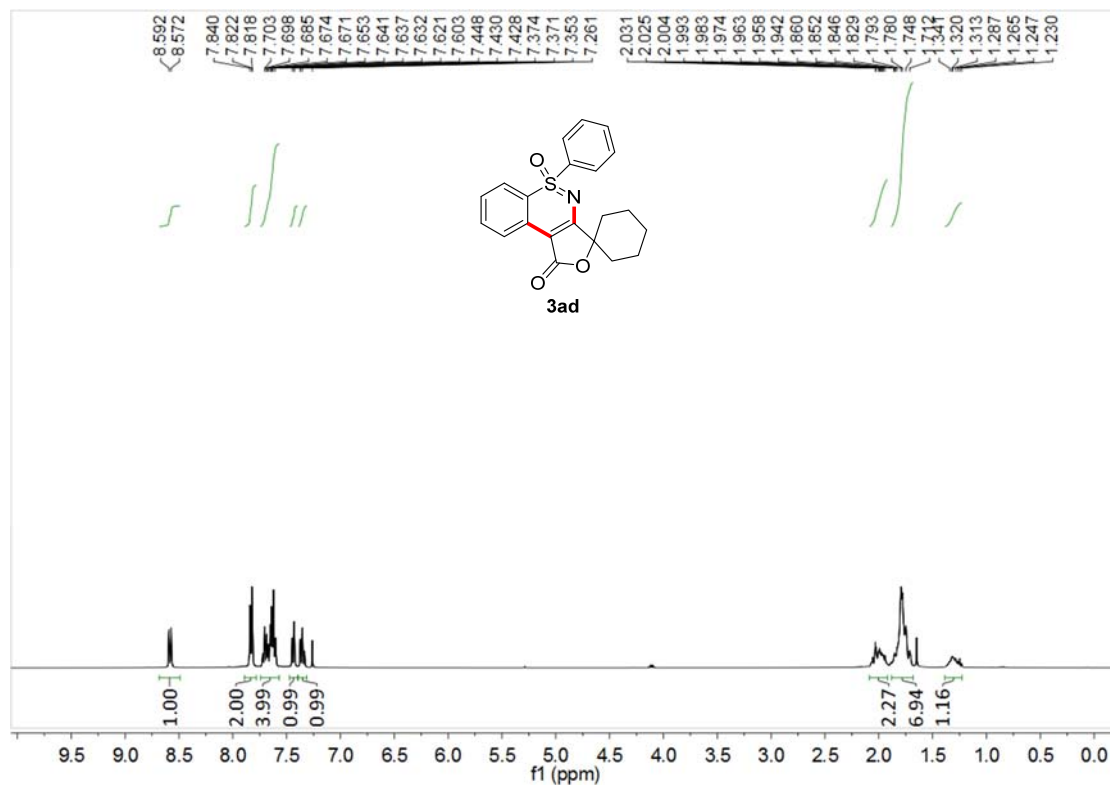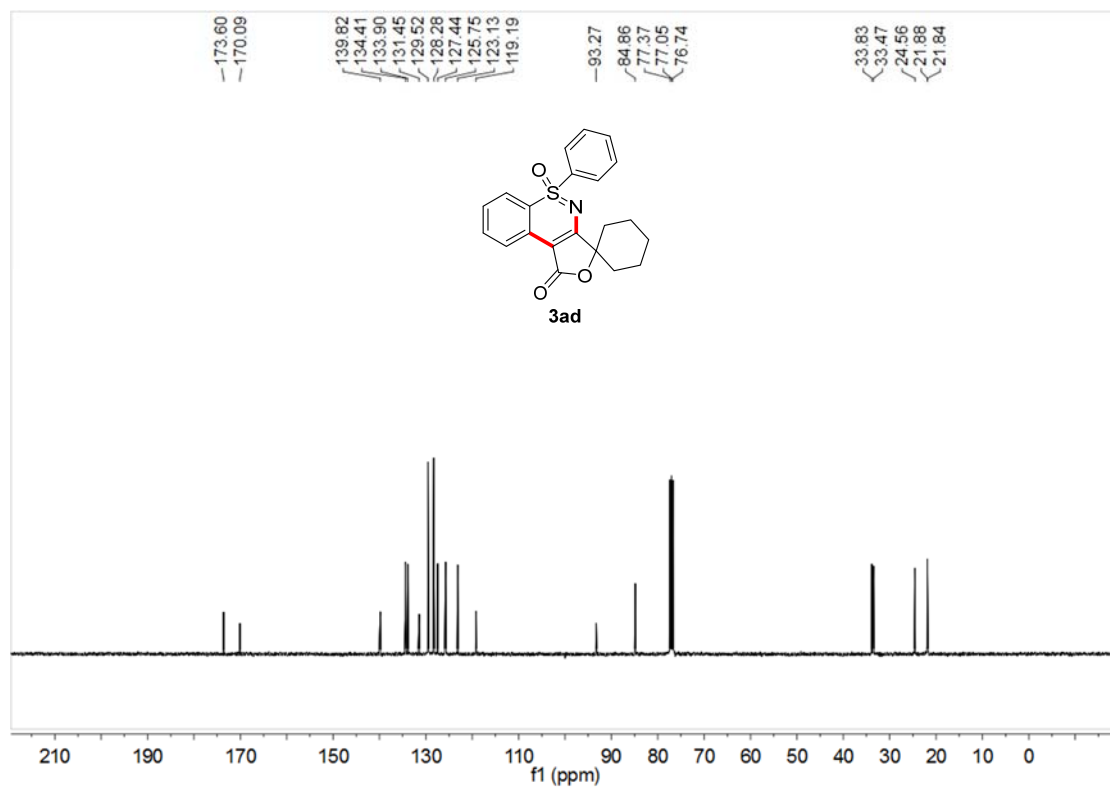

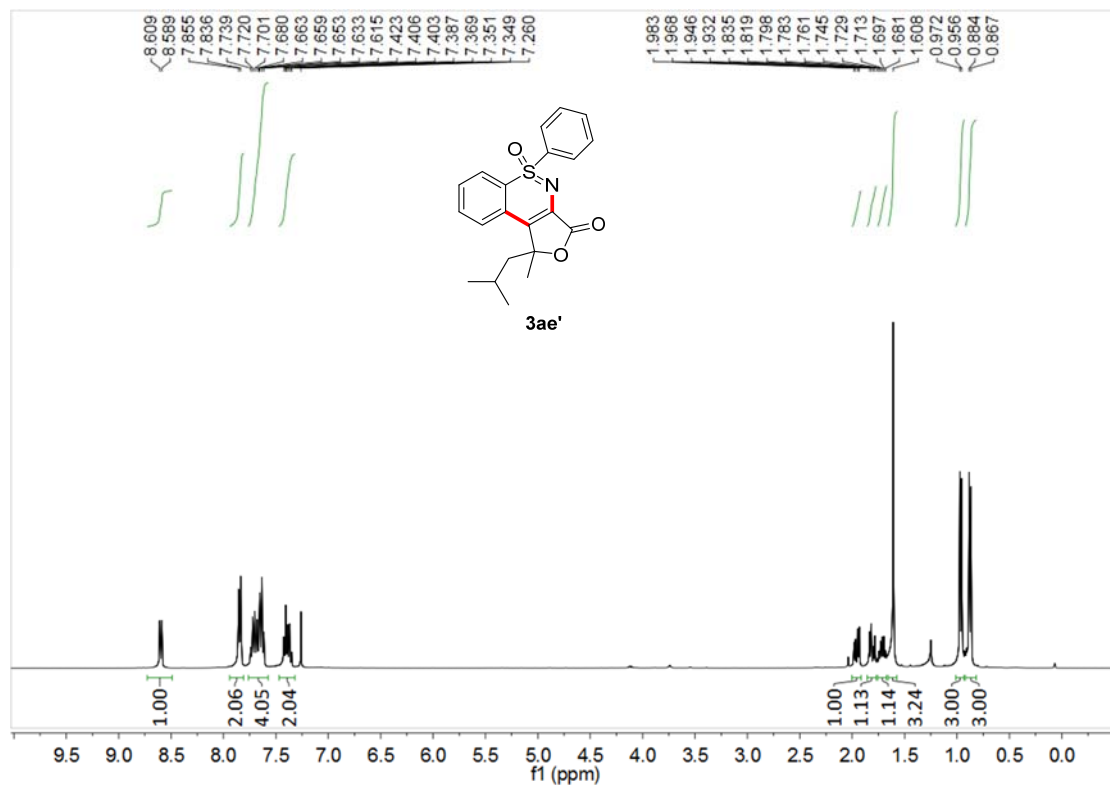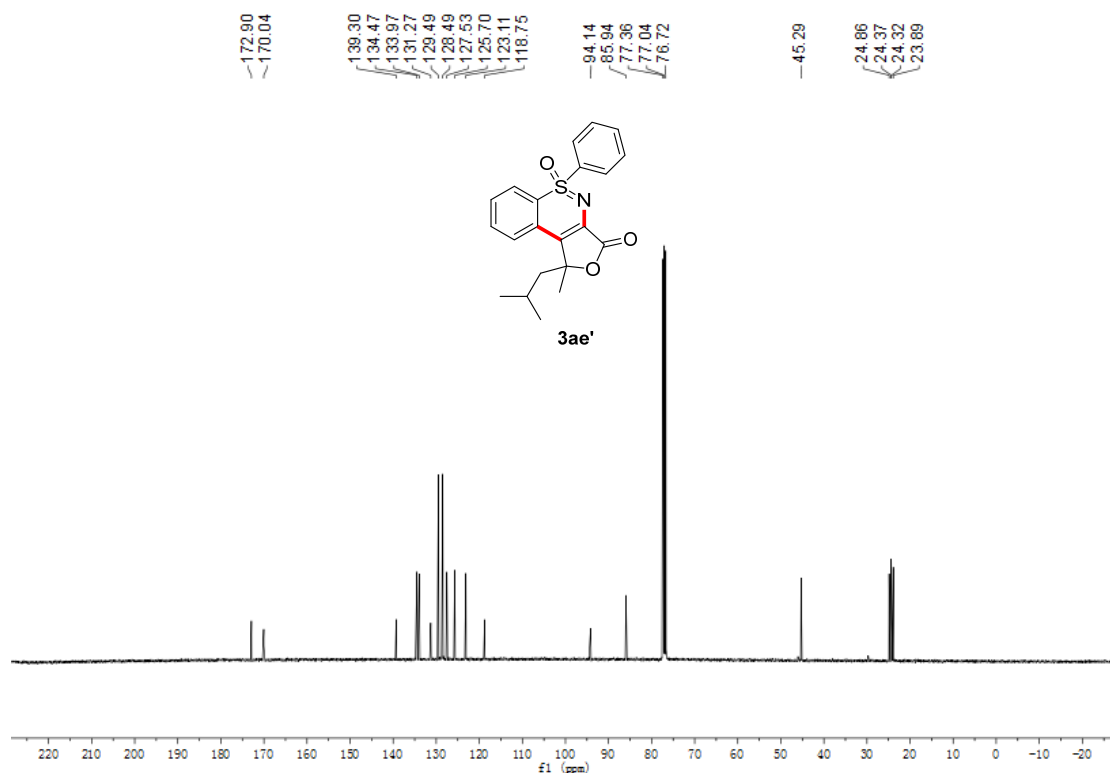

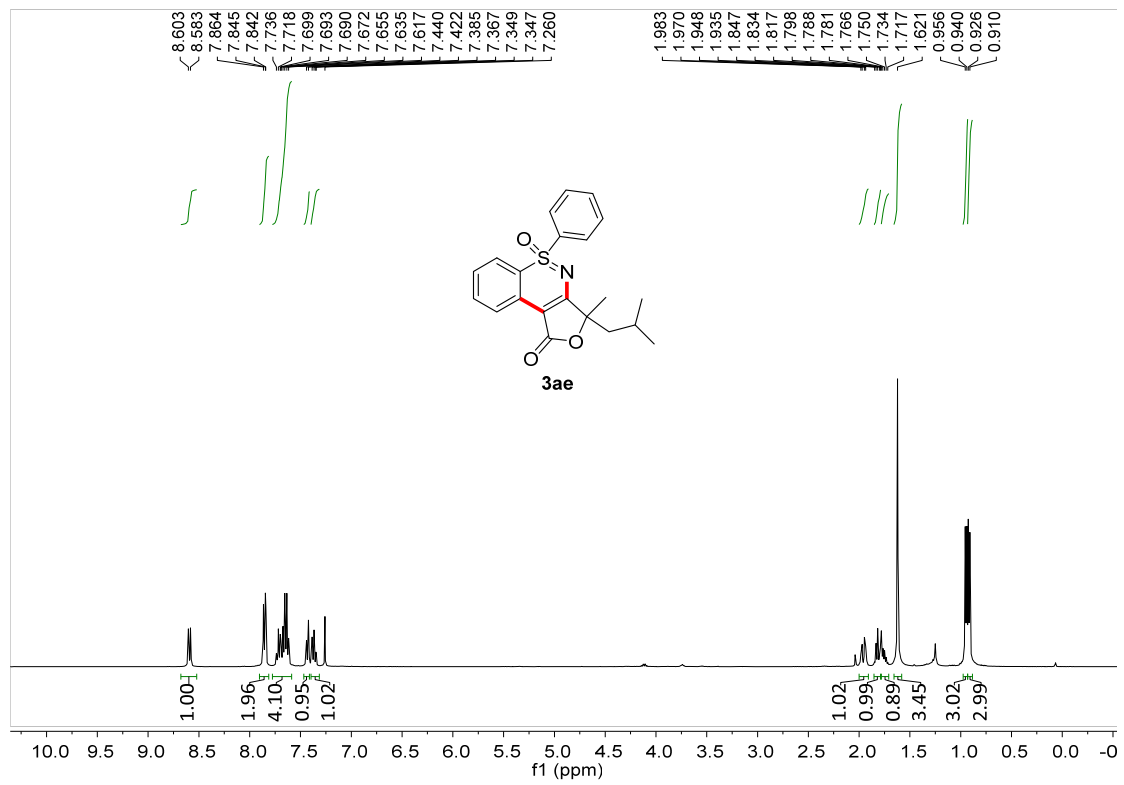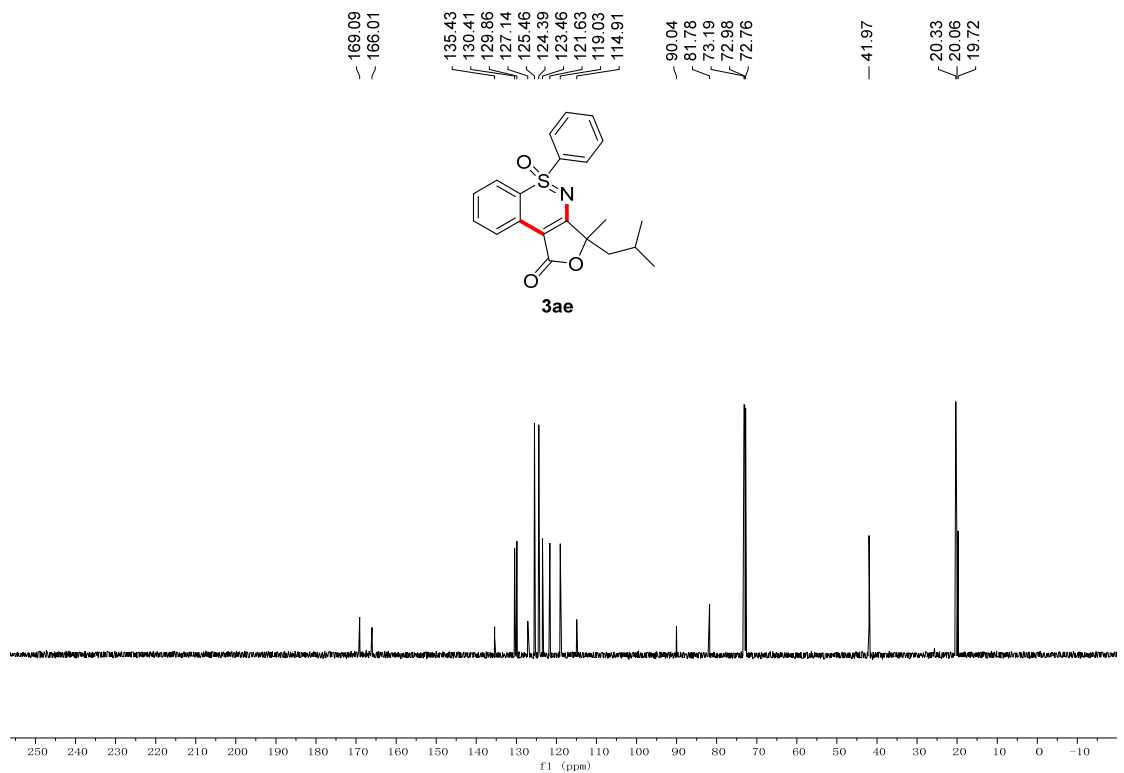

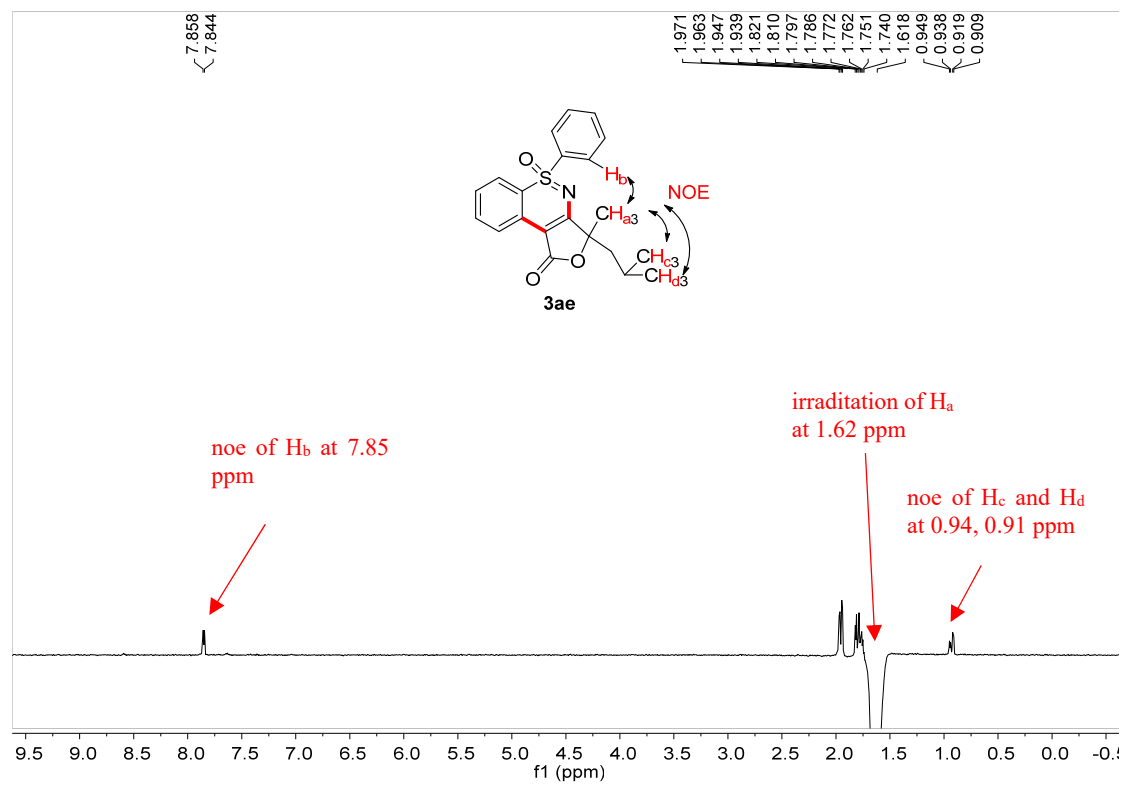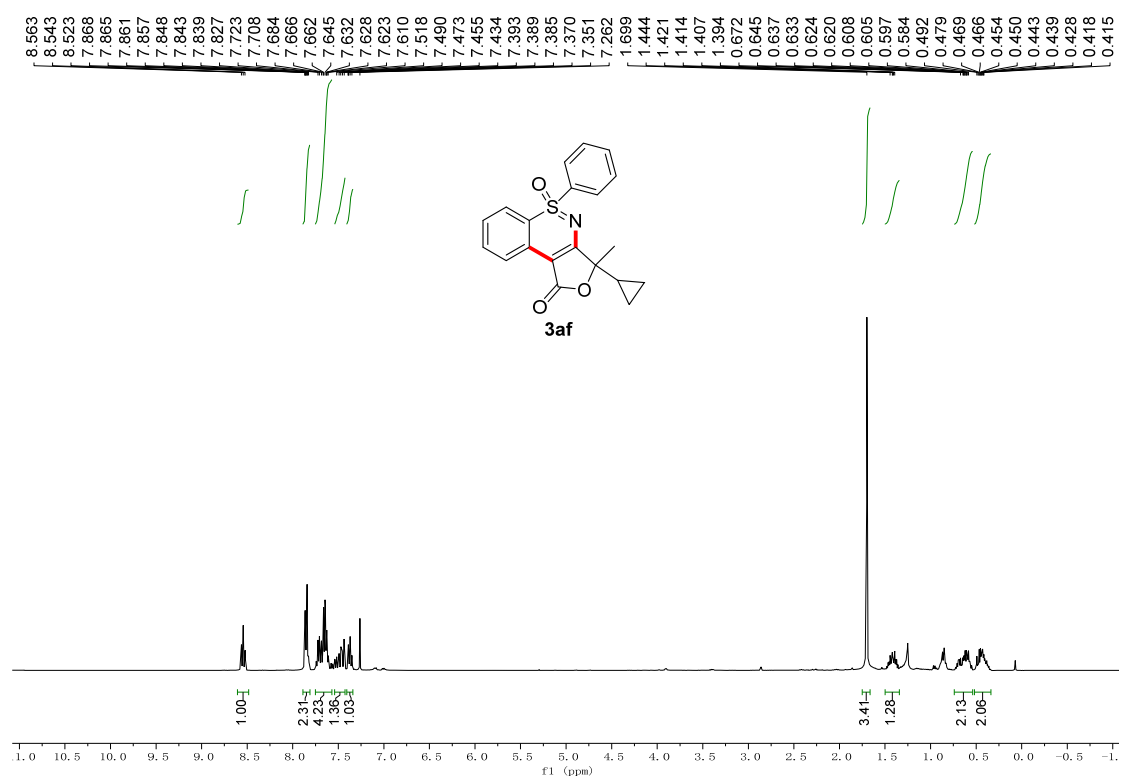

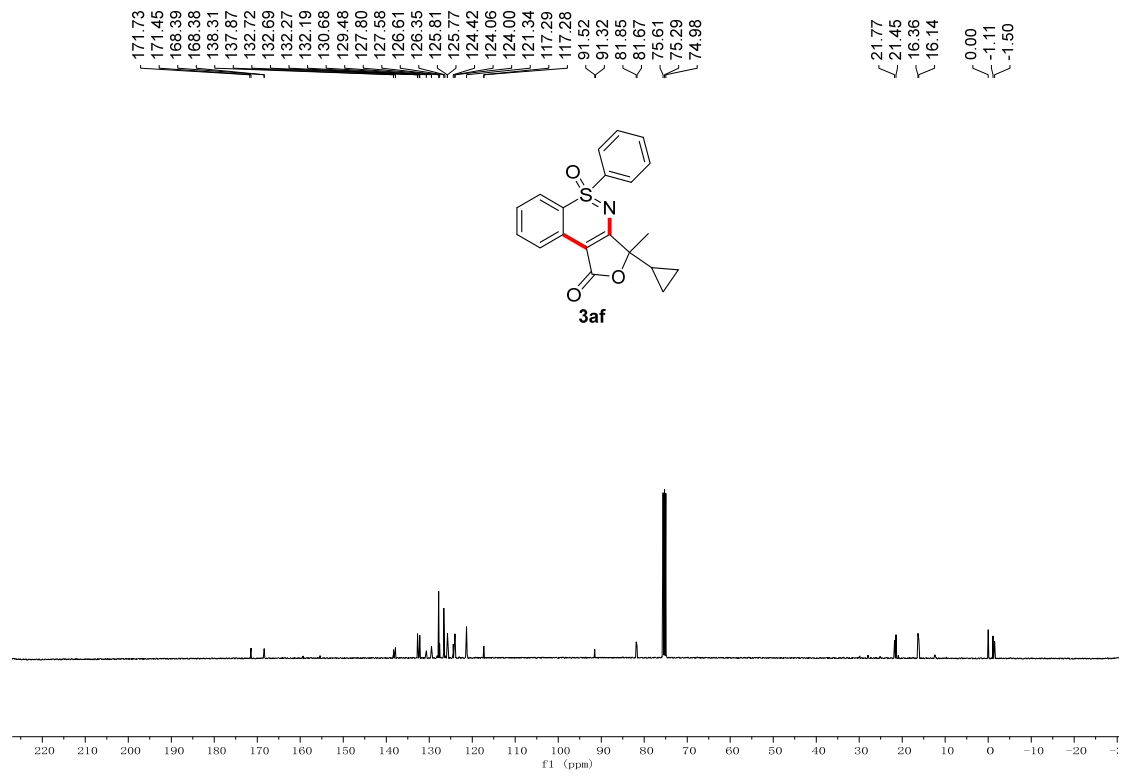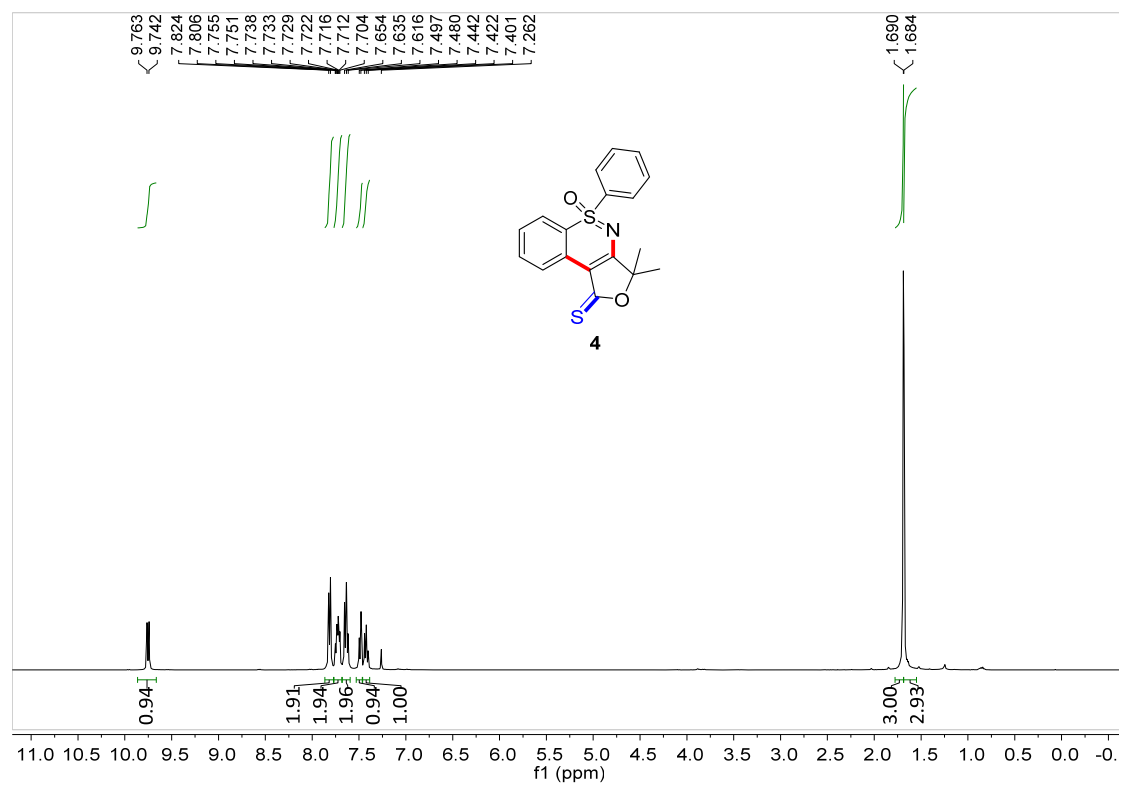

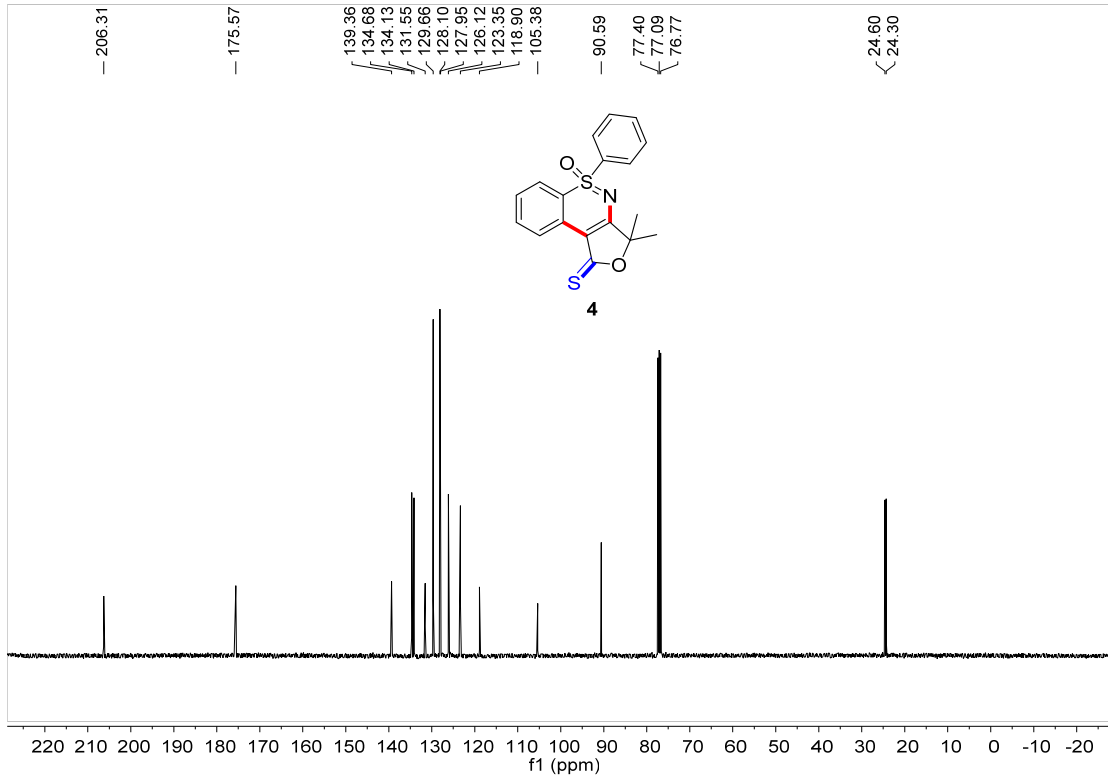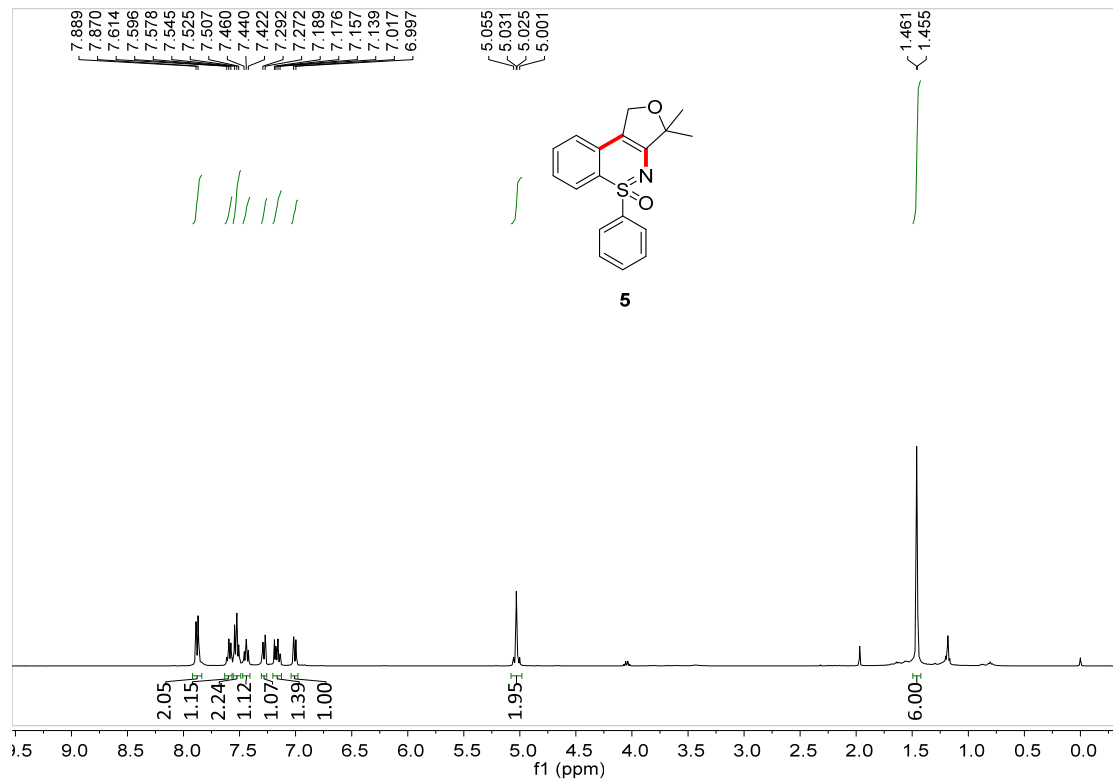

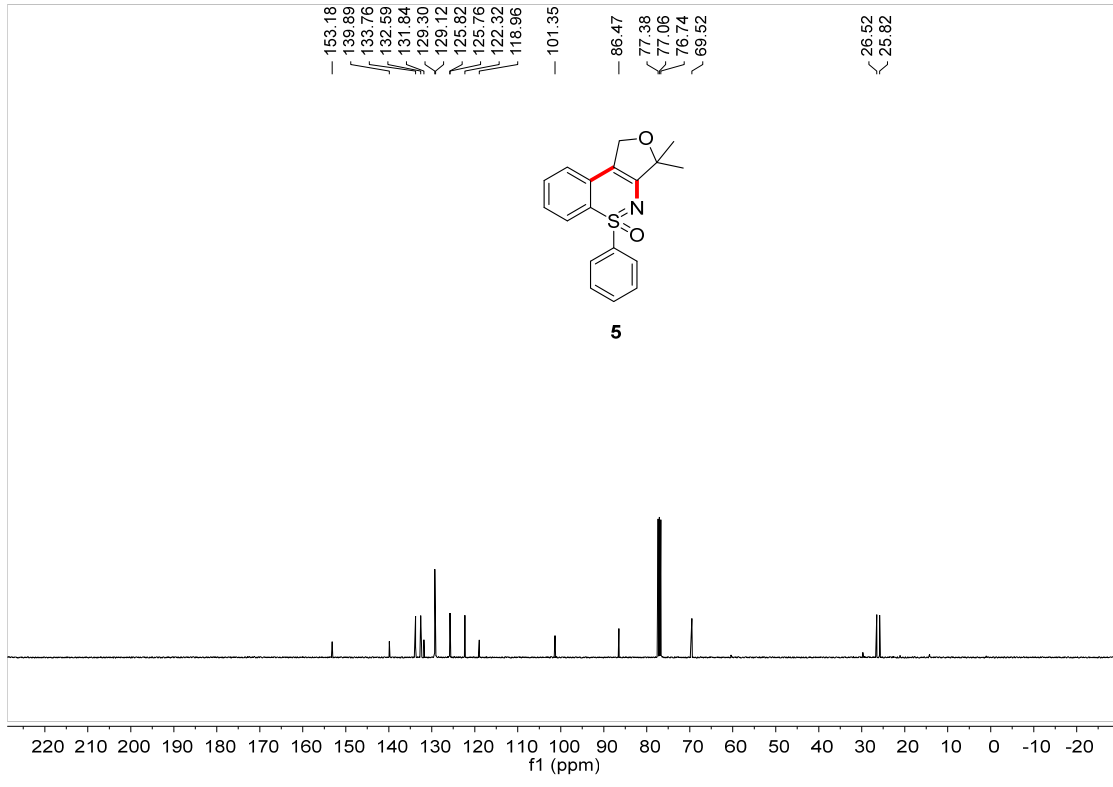

Supplement: c9qo00579j1.pdf [file c9qo00579j1.pdf]
